1 **An association between the gut microbiota and immune cell dynamics in humans.**

2 Jonas Schluter<sup>1</sup>, Jonathan U. Peled<sup>2,3</sup>, Bradford P. Taylor<sup>1</sup>, Melody Smith<sup>2,3</sup>, Kate A. Markey<sup>2,3</sup>, Ying  
3 Taur<sup>4</sup>, Rene Niehus<sup>5</sup>, Anna Staffas<sup>6</sup>, Anqi Dai<sup>2</sup>, Emily Fontana<sup>4</sup>, Luigi A. Amoretti<sup>4</sup>, Roberta J.  
4 Wright<sup>4</sup>, Sejal Morjaria<sup>4</sup>, Maly Fenelus<sup>7</sup>, Melissa S. Pessin<sup>7</sup>, Nelson J. Chao<sup>8</sup>, Meagan Lew<sup>8</sup>, Lauren  
5 Bohannon<sup>8</sup>, Amy Bush<sup>8</sup>, Anthony D. Sung<sup>8</sup>, Tobias M. Hohl<sup>4</sup>, Miguel-Angel Perales<sup>2,3</sup>, Marcel R.M.  
6 van den Brink<sup>2,3</sup>, Joao B. Xavier<sup>1</sup>

7 1) Computational and Systems Biology Program, Sloan Kettering Institute, Memorial Sloan Kettering Cancer  
8 Center, New York, NY, USA

9 2) Adult Bone Marrow Transplantation Service, Department of Medicine, Memorial Sloan Kettering Cancer  
10 Center, New York, NY, USA

11 3) Weill Cornell Medical College, New York, NY, USA

12 4) Infectious Disease Service, Department of Medicine, and Immunology Program, Sloan Kettering Institute,  
13 New York, NY, USA.

14 5) Harvard University, T.H. Chan School of Public Health, 677 Huntington Avenue, Boston, MA 02115

15 6) Sahlgrenska Cancer Center, Department of Microbiology and Immunology, Institute of Biomedicine,  
16 University of Gothenburg, SE-405 30, Gothenburg, Sweden

17 7) Department of Laboratory Medicine, Memorial Sloan Kettering Cancer Center, New York, NY, USA

18 8) Division of Hematologic Malignancies and Cellular Therapy, Duke University School of Medicine

19 Correspondence: [jonas.schluter+mskcc@gmail.com](mailto:jonas.schluter+mskcc@gmail.com), [xavierj@mskcc.org](mailto:xavierj@mskcc.org)

20

21 **ABSTRACT**

22 The gut microbiota influences development and homeostasis of the mammalian immune system<sup>1-3</sup>,  
23 can alter immune cell compositions in mice<sup>4-7</sup>, and is associated with responses to immunotherapy  
24 that rely on the activity of peripheral immune cells<sup>8-12</sup>. Still, our understanding of how the microbiota  
25 modulates immune cells dynamics remains limited, particularly in humans where a lack of deliberate  
26 manipulations makes inference challenging. Here we study hundreds of hospitalized—and closely  
27 monitored—patients receiving hematopoietic cell transplantation as they recover from chemotherapy  
28 and stem cell engraftment. This aggressive treatment causes large shifts in both circulatory immune  
29 cell and microbiota populations, allowing the relationships between the two to be studied  
30 simultaneously. We analyzed daily changes in white blood cells from 2,235 patients, and 10,680  
31 longitudinal microbiota samples to identify bacteria associated with those changes. Bayesian  
32 inference and validation across patient cohorts revealed consistent associations between gut bacteria  
33 and white blood cell dynamics in the context of immunomodulatory medications, clinical metadata  
34 and homeostatic feedbacks. We contrasted the potency of fermentatively active, obligate anaerobic  
35 bacteria with that of medications with known immunomodulatory mechanism to estimate the potential  
36 of the microbiota to influence peripheral immune cell dynamics. Our analysis establishes and  
37 quantifies the link between the gut microbiota and the human immune system, with implications for  
38 microbiota-driven modulation of immunity.

39 **MAIN TEXT**

40 Experiments in mice provide evidence that the mammalian intestinal microbiome influences the  
41 development<sup>1-3</sup> and homeostasis of its host's immune system<sup>4-7,13-15</sup>. In humans, inflammatory bowel  
42 diseases correlate with functional dysbiosis in the gut microbiota<sup>16,17</sup>. Children born preterm and at  
43 term have different gut microbiome compositions and differ in the development of immune cell  
44 populations in their blood<sup>18</sup>. The composition of the gut microbiota may also influence the success of  
45 immunotherapies<sup>8-11</sup>. Immune checkpoint inhibitor therapy relies on activation of circulating T-cells  
46 and its success has, independently, been associated with abundances of intestinal anaerobic genera  
47 such as *Akkermansia*<sup>9</sup> and *Faecalibacterium*<sup>10</sup>. It is therefore an intriguing prospect to augment  
48 treatments such as cancer immunotherapy<sup>19</sup>, including the burgeoning field of chimeric antigen  
49 receptor (CAR) T-cell therapy<sup>20</sup>, by leveraging microbiome-driven immune system modulation.

50 Our understanding of how the microbiota influences the dynamics of immune cells in  
51 humans, and how this compares to deliberate immunomodulatory interventions nevertheless remains  
52 limited. Experiments with animals may not always be sufficient to study mechanisms of  
53 microbiome-immune interactions and translate them to human biology as the microbial ecology in the  
54 gut of an animal model may be different from humans receiving treatment<sup>21</sup>. On the other hand,  
55 studies directly in patients may be criticized when they have small subject numbers, are cross-  
56 sectional, lack statistical power, or disregard key confounders such as medications<sup>21</sup>.

57 To overcome these limitations, we conducted a large-scale longitudinal study of the gut  
58 microbiota and day-by-day changes in circulatory immune cell counts. We investigated immune  
59 reconstitution dynamics after allogeneic hematopoietic cell therapy (HCT) within all 2,926 patients  
60 who underwent HCT at Memorial Sloan Kettering for various hematological malignancies, including  
61 leukemia, between 2003 and 2019 (**Figure 1A, Table S1**). The conditioning regimen of radiation and  
62 chemotherapy administered to HCT patients is the most severe perturbation to the immune system  
63 deliberately performed in humans and thus offers a unique opportunity to investigate dynamic links  
64 between the gut microbiota and the immune system directly in humans. Conditioning depletes white  
65 blood cell counts (**Figure 1A**) and can lead to prolonged periods of neutropenia (<500 neutrophils per  
66  $\mu$ l blood). Immune reconstitution begins after transplanted stem cells have matured sufficiently to

67 release granulocytes from the bone marrow (neutrophil engraftment is defined as 3 consecutive days  
 68 with >500 neutrophils per  $\mu\text{l}$  blood, **Figure 1A-C**). The blood of each patient is carefully monitored

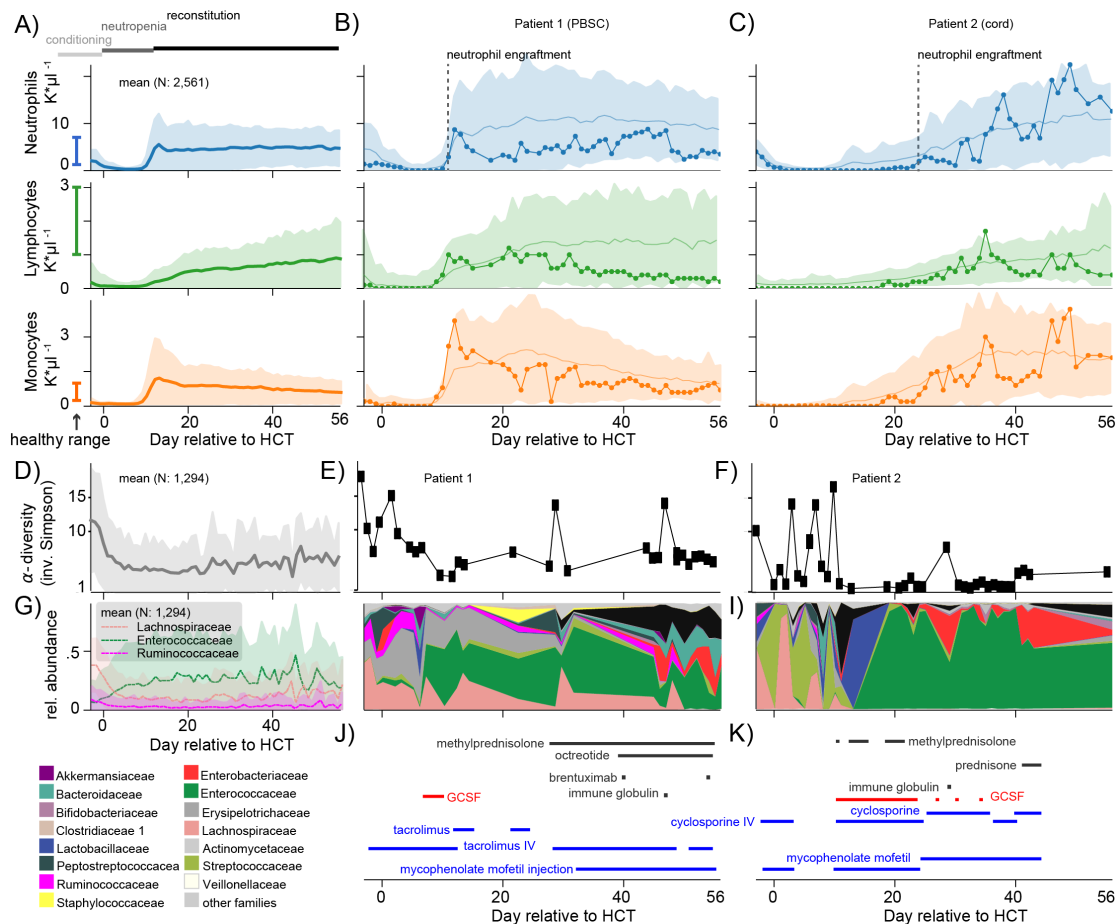

69 throughout this recovery, and medications are administered to modulate the immune cell dynamics,  
 70 including granulocyte-colony stimulating factor (GCSF) to increase neutrophil counts, and  
 71 immunosuppressants such as mycophenolate mofetil or tacrolimus to prevent complications such as  
 72 graft-vs-host disease (**Figure 1 J,K**). To investigate if the composition of the gut microbiota is  
 73 associated with the dynamics of circulating white blood cells, we analyzed detailed blood and clinical



74 metadata of our patients between 3 days before HCT and until 100 days post neutrophil engraftment  
75 (excluding pediatric patients, and other exclusion criteria: N=2,235, supplementary methods, **Figure**  
76 **S1**). During this period patients are monitored carefully, and our analysis included over 140,000 host  
77 phenotype measurements in the form of complete blood counts which quantify the most abundant  
78 white blood cells—neutrophils, lymphocytes, monocytes, eosinophils—as well as platelet counts  
79 (**Figure 1, S1**). We started collecting patients' fecal microbiota data in 2009<sup>22</sup>, and by now obtained  
80 10,680 high frequency, longitudinal microbiota compositions.

81 HCT patients lose gut microbiota biodiversity and commensal microbial families during their  
82 treatment (**Figure 1D-I**); this figure generated from N=1,294 HCT patients clarifies the preliminary  
83 trends observed in previous studies from smaller datasets<sup>23,24</sup>. We have shown recently that mice with  
84 a depleted intestinal flora had worse recoveries of white blood cells after bone-marrow  
85 transplantation<sup>25</sup>. In our patients, microbial diversity usually recovers slowly during white blood cell  
86 reconstitution (**Figure 1D**); however, microbiota recovery as well as immune reconstitution can vary  
87 strongly between patients and treatment types (**Figure 1B,C,J,K, S1**). This variation is illustrated by  
88 the distinct trajectories of patient 1 who received a graft of peripheral blood stem cells (PBSC),  
89 retained high microbiota diversity and engrafted earlier (**Figure 1B,E,H**), and patient 2 who received  
90 a graft of umbilical cord blood (cord), lost microbiota diversity and engrafted later (**Figure 1C,F,I**).  
91 Low microbiota diversity at the time of neutrophil engraftment has been associated with 5-fold  
92 increased transplant-related mortality<sup>26</sup>, suggesting that that the joint recovery of the microbiota and  
93 white blood cells in circulation is critical for clinical outcomes.

94 To detect a directional and causal link between the microbiota and white blood cells, we first  
95 used data from a recent prospective randomized trial of autologous fecal microbiota transplantation  
96 (auto-FMT), which is a microbiota manipulation experiment done directly in our patients<sup>23</sup>  
97 (supplementary methods). Twenty-four patients (**Figure 2A, Table S2**) underwent randomization,  
98 resulting in 10 untreated control and 14 treated patients, including patient 3 in **Figure S2**. To  
99 investigate if auto-FMT affected white blood cell reconstitution, we compared the 24 patients'  
100 neutrophil, lymphocyte, monocyte (**Figure 2**) and total white blood cell counts (**Figure S3**) post-  
101 engraftment (i.e. when the transplanted hematopoietic cells begin producing new white blood cells,

102 **Figure 2A,S3).** FMT procedures were conducted at variable time points relative to neutrophil  
 103 engraftment, but overall, we observed higher counts of each white blood cell type in patients who  
 104 received an auto-FMT during the first 100 days post neutrophil engraftment ( $p < 0.001$ , **Figure 2B,S3-**  
 105 **S6).**  
 106

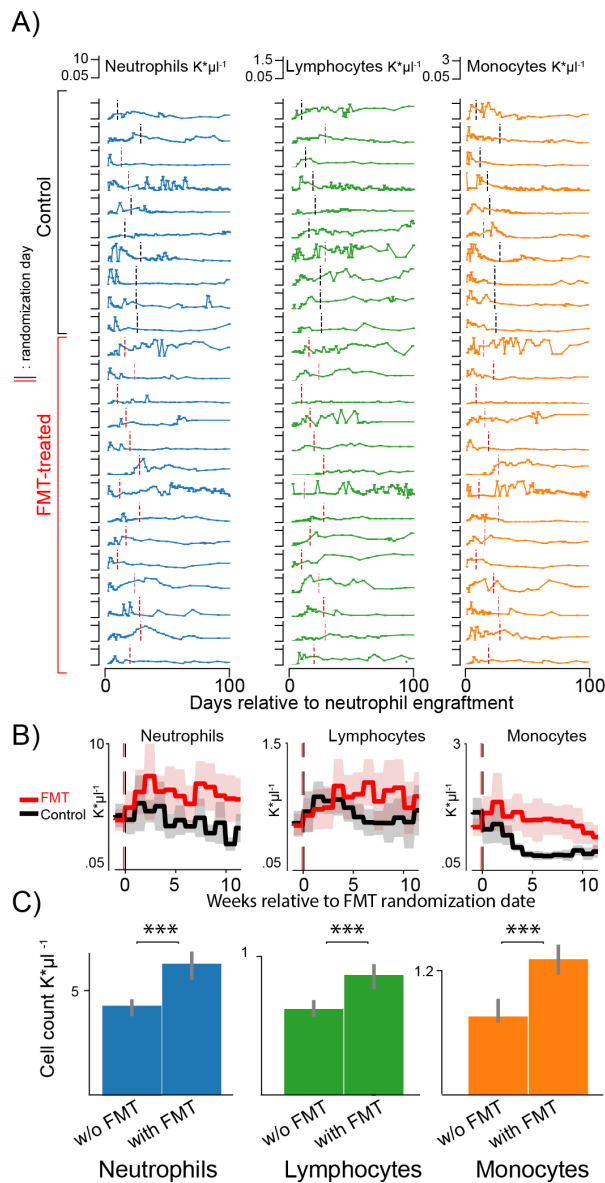

107 **Figure 2: Neutrophil, lymphocyte and monocyte counts increased in FMT-treated patients**  
 108 **during the weeks following the treatment compared to control patients.** A) Absolute counts of  
 109 neutrophils (blue), lymphocytes (green) and monocytes (orange) in 24 patients enrolled in a randomized  
 110 controlled trial to receive an autologous fecal microbiota transplant post-neutrophil engraftment (10 control:  
 111 black vertical line, 14 FMT treated: red vertical line,). B) Weekly mean cell counts aligned to the date of  
 112 randomization into FMT treatment arm (red) or control (black). Line: mean per week, shaded region: 95%-CI.  
 113 C) Results from a linear mixed effects model with random effects per patient and per day relative to neutrophil  
 114 engraftment confirms that neutrophil, lymphocyte and monocyte counts are higher in patients receiving auto-  
 115 FMT after their treatment as compared to control patients after the randomization date; bars and confidence  
 116 intervals for the averages of observed white blood cell counts without FMT and post-FMT (\*\*\*:  $p < 0.001$ ).  
 117

118           The increased white blood cells in patients receiving auto-FMT could be due to the  
119 reconstitution of a complex microbiota that we saw in these patients<sup>23</sup> and the associated metabolic  
120 capabilities<sup>6,7,25</sup>, or it could be a systemic response to a severe therapy which introduced billions of  
121 intestinal organisms at once via an enema (no enema was administered to control patients<sup>23</sup>).  
122 Moreover, while the mixed-effects model accounted for patient-specific HCT treatments in this  
123 randomized patient cohort, chance differences in extrinsic factors such as different  
124 immunomodulatory drug exposures may have affected this result due to the small cohort size.  
125 Nonetheless, observing that auto-FMT recipients had increased white blood cell counts supports the  
126 notion that the microbiota can modulate the peripheral immune system. High counts of lymphocytes  
127 during immune reconstitution has been associated with improved clinical outcomes<sup>27</sup>. Additionally, in  
128 our HCT patients, a higher average level of white blood cells measured across a period of 100 days  
129 after neutrophil engraftment (supplementary methods) confirms a positive association with 3-year  
130 survival (hazard ratio: 0.91, p:0.04). Determining which taxa modulate immune dynamics could open  
131 new ways to improve robust immune reconstitution, which is critical for clinical outcomes<sup>27-29</sup>.

132           To address this question, we next investigated the link between the gut microbiota and the  
133 dynamics of white blood cell recovery in our large observational cohort of HCT patients. Homeostasis  
134 of circulatory white blood cell counts is a complex, dynamic process: neutrophils, lymphocytes and  
135 monocytes are formed and released into the blood *de novo* by differentiation of hematopoietic  
136 progenitor cells from the bone marrow, and they can be mobilized from thymus and lymph nodes  
137 (lymphocytes), spleen, liver and lungs (neutrophils); they can also migrate from the blood to other  
138 tissues when needed<sup>30</sup>. These processes are dynamic sources and sinks of circulatory white blood  
139 cells, and they can be modulated by drugs administered to patients receiving HCT. To identify factors  
140 associated with these dynamic source- and sink-processes—including the microbiota—we developed  
141 a two-stage approach analyzing the changes of white blood cell counts between two days (i.e. the  
142 rates of cell count increases and decreases). Stage 1 served as a feature selection stage where we used  
143 data of 1,096 patients (after filtering for qualifying samples and applying exclusion criteria, see  
144 supplementary methods) *without* available microbiome information to identify associations between  
145 clinical metadata, including immunomodulatory medications (methods), and changes of white blood

146 cell counts from one day to the next (**Figure 3A**). Stage 2 was performed on data from an independent  
147 cohort of 841 different patients at MSK from whom concurrent microbiome samples were available.  
148 Stage 2, our main analysis, sought to reveal associations between the abundance of microbial taxa and  
149 the daily changes in blood cell counts in context of immunomodulatory medications, additional  
150 clinical metadata and the current state of the blood itself.

151 In stage 1 we calculated the changes in neutrophil, lymphocyte and monocyte counts during  
152 patients' recovery from >20,000 pairs of post-engraftment blood samples separated by a single day  
153 (**Figure 3B, S7-9**, supplementary methods). Using a cross-validated feature selection approach, we  
154 detected medications and HCT treatment parameters that were associated with different rates of  
155 change in neutrophil, lymphocyte and monocyte counts, including, as expected, GCSF and the graft  
156 stem cell sources (**Figure S7-S9, Table S1**).

157 During stage 2 we sought to identify associations between bacterial taxa of the gut microbiota  
158 and the dynamics of immune cells in circulation. For this, we performed Bayesian inferences using  
159 data from different sets of patients *with* available microbiome samples. Stage 1 had identified—as  
160 expected—that stem cell graft sources are associated with immune reconstitution kinetics (e.g. cord  
161 on average slower compared with PBSC<sup>31</sup>), and we therefore stratified our patients by graft source in  
162 stage 2. The model of stage 2 now included microbial genera as predictors of observed changes in  
163 white blood cell counts, in addition to the medications selected in stage 1, clinical features  
164 (conditioning intensity, age, sex), and the current state of the blood in the form of counts of  
165 neutrophils, lymphocytes, monocytes, eosinophils, and platelets. The data comprised 841 patients, but  
166 approximately 60% of the stool samples paired with a daily change in white blood cell counts were  
167 taken before neutrophil engraftment (**Figure 3B, Table S1**, supplementary methods), i.e. when blood  
168 cells counts were zero. In total, we analyzed 2,615 post-engraftment observations of changes in  
169 neutrophil counts during immune reconstitution (lymphocytes: 2,006, monocytes: 2,534) with paired  
170 stool samples which provided a large sample of observed white blood cell dynamics (**Figure 3B,**  
171 **Table S3,S4**). We first focused on the data from the largest (**Figure 3C**) cohort—patients who  
172 received a PBSC graft—and withheld the other cohorts (bone marrow, BM; T-cell depleted graft  
173 (*ex-vivo*) by CD34+selection, TCD; and cord) to use as independent validation cohorts. For this

174 validation, we analyzed TCD, BM, and cord patients' data in the same way as PBSC patients' data  
175 and compared the resulting posterior coefficient distributions (methods). We assigned coefficients  
176 obtained from the PBSC cohort a validation score (v-score) between 0 and 3, representing the number  
177 of times that the focal coefficient was validated in the other cohorts; but, conservatively, the score was  
178 always set to zero if we observed counter-evidence among any of the other data sets, i.e. evidence that  
179 coefficients had the opposite sign, ensuring only the most consistent associations were considered as  
180 validated. Finally, we analyzed data from another patient cohort consisting of 493 bone marrow  
181 transplantation recipients treated at Duke University including 9,603 blood samples and a total of 629  
182 microbiota samples from 218 patients, albeit with lower sampling density, and we used the results  
183 from this analysis for further validation.

184 Notably, as a verification of our approach, we detected associations between the  
185 administration of immunomodulators and increased or decreased rates of immune cell count changes  
186 consistent with the known biological mechanism of these medications (**Figure 3C,S10-S13**). The  
187 strongest across all predictors is the well-known neutrophil-increasing effect of GCSF<sup>32</sup>; GCSF  
188 administration—used to accelerate recovery from chemotherapy-induced neutropenia<sup>32</sup>—was  
189 associated with a +140% increase in the rate of neutrophil changes from one day to the next ([+114%,  
190 +170%], 95 percent probability density interval [HPDI95]). This finding was observed in all MSK  
191 validation data sets (v-score=3, **Figure 3D**), as well as among Duke University patients (**Figure**  
192 **S14,S15**). We furthermore found a GCSF-associated increase of +43% ([+30%, +58%]HPDI95, v-  
193 score=3) in monocyte rates, and, although smaller, in lymphocyte rates (+16%, [+5%, +27%]HPDI95,  
194 v-score=3). Both neutrophil and lymphocyte rates decreased following the exposure to antihistamine  
195 or immunosuppressive medications (cetirizine -18%, [-35%, +5%]HPDI95, mycophenolate  
196 mofetil -8% [-15%,+1%]HPDI95, respectively). Finally, less intensive chemotherapeutic conditioning  
197 regimens (non-ablative conditioning and reduced intensity) were associated with larger lymphocyte  
198 and monocyte count growth rates during immune reconstitution (**Figure S10C**)

199 Beyond associating medications in agreement with their known biological mechanism, our  
200 analysis detected associations between the current count of white blood cells and their rate of change:  
201 a negative association among lymphocytes, negative associations between counts of neutrophils and

202 lymphocytes with the rates of monocytes, and a negative association between the counts of platelets  
 203 and lymphocytes and the rates of neutrophils (**Figure 3E**). Conversely, we found positive associations  
 204 between monocytes and the rates of each of the investigated white blood cell subsets. These  
 205 associations, derived from daily counts of white blood cells, could reflect a complex network  
 206 underlying the regulation of blood immune cell composition<sup>30</sup>. More importantly, the associations  
 207 quantified for medications and potential homeostatic feedbacks provided a benchmark against which  
 208 we could compare associations from gut microbial taxa.

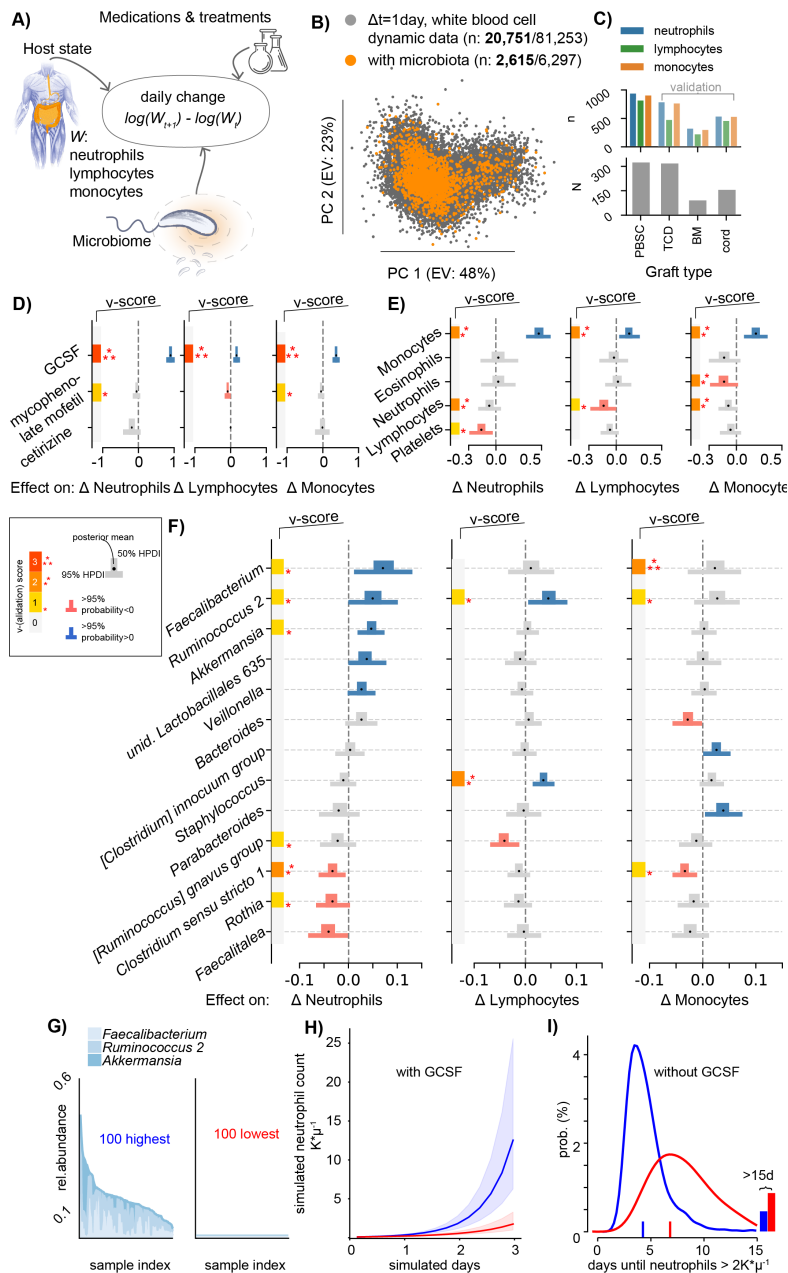

209

210 **Figure 3: Bayesian inference conducted in context of the host state (white blood cell and platelet counts)**  
 211 **and clinical variables including immunomodulatory medications reveals the microbiota potential to affect**

212 **daily changes in circulatory white blood cell counts.** A) Cartoon of the model: observed changes in white  
213 blood cell counts between two consecutive days are associated with the current state of the host in the form of  
214 blood cell counts in circulation, the administration of immunomodulatory medications, patient and clinical  
215 metadata, and the state of the microbiome. B) Visualization of the dynamic white blood cell data; scatter plot of  
216 the principal components (PC) of observed daily changes of neutrophils, lymphocytes and monocytes without  
217 (grey, see **Figures S7-9**) and with (orange) concurrent longitudinal microbiome data (bold: post engraftment  
218 sample counts). C) PBSC patients (N=312) provided the most blood samples with simultaneous microbiome  
219 data (n=995) relative to TCD, BM and cord patients, who were used as validation data sets. D-F) PBSC patient  
220 data inference results; bars show the posterior parameter estimate distributions (thin: 95% highest posterior  
221 density intervals, HPDI95, thick: HPDI50) for the jointly inferred associations between treatments (D), white  
222 blood cells counts (E), and fecal microbiota genus log-relative abundances (F) with the observed daily changes  
223 in neutrophils, lymphocytes and monocytes. v-score: number of validation cohort confirming associations,  
224 *always* set to zero if invalidated in any of the TCD, BM, or cord cohorts (additional coefficients in **Figure S10**).  
225 G) 100 microbiota samples with highest (left) or lowest (right) relative abundances of *Faecalibacterium*,  
226 *Ruminococcus 2* and *Akkermansia*. H) Simulation of the neutrophil population over time in presence of GCSF  
227 with microbiota compositions sampled either from those high (blue) or low (red) in *Faecalibacterium*,  
228 *Ruminococcus 2* and *Akkermansia* relative abundance as shown in G); line: median of 1,000 simulations, shaded  
229 regions: quartile range of simulated neutrophil trajectories. I) In absence of GCSF, equivalent simulations to H)  
230 predict that the time to reach neutrophil counts  $>2K*\mu l^{-1}$  for the first time after HCT when the microbiota is  
231 high (red) in *Faecalibacterium*, *Ruminococcus 2* and *Akkermansia* compared with when these genera are low  
232 (blue) will decrease from 6.8 (95%-confidence interval, CI: [6.5, 7]) days to 4.4, (CI: [4.3, 4.5]).  
233

234 We identified microbial genera that consistently associated with increases or decreases in  
235 white blood cell counts by first using data from the PBSC patients and then validating the associations  
236 in the other cohorts (**Figure 3F**). Higher abundances of *Faecalibacterium* (+8%, [+1%,  
237 +14%]HPDI95 per log<sub>10</sub>), *Ruminococcus 2* (+5%, [0%, +10%]HPDI95) and *Akkermansia* (+4%,  
238 [+1%, +7%]HPDI95) were associated with greater neutrophil increases, whereas increased *Rothia* (-  
239 3%, [-7%, 0%]HPDI95), and *Clostridium sensu stricto 1* (-3%, [-6%, 0%]HPDI95) relative  
240 abundances associated with reduced neutrophil rates. These results were validated in univariate  
241 analyses conducted in the Duke University cohort (**Figure S14, S15**). We also conducted the  
242 inference using total genus abundances as predictors instead of relative abundances; this analysis  
243 confirmed *Faecalibacterium* as most strongly associated with neutrophil dynamics (**Figure S16**,  
244 supplementary methods). *Staphylococcus* was positively associated with lymphocyte rates (+4%,  
245 [+1%, +6%]HPDI95) and, again, *Ruminococcus 2* was also associated with faster lymphocyte  
246 increases (+5%, [+1%, +9%]HPDI95). Both *Faecalibacterium* as well as *Ruminococcus 2* also  
247 associated with increases in monocytes, and while this association was validated in other cohorts (v-  
248 score 3 and 1, respectively), there was higher uncertainty of the association estimate (HPDI50>0).  
249 Again, *Clostridium sensu stricto 1* (-3% [-5%, -1%]HPDI95) associated consistently with decreased  
250 rates of monocytes. The associations we identified—and validated in other cohorts—between



251 microbial taxa in the gut and daily changes in white blood cell counts support the idea that  
252 hematopoiesis and mobilization respond to the composition of the gut microbiome, influencing  
253 systemic immunity<sup>33</sup>.

254 Most of the taxa that strongly associated with white blood cell dynamics were obligate  
255 anaerobes. *Rothia*, was a notable exception: this aerobic genus is typically found in the oral cavity<sup>34</sup>  
256 but can become an opportunistic pathogen in immunosuppressed patients and is not known to provide  
257 metabolic functions to the host<sup>35</sup>. Some obligate anaerobes, on the other hand, produce short-chain  
258 fatty acids<sup>36,37</sup> and bacterial cell-wall molecules<sup>1,38,39</sup> that modulate immune responses and  
259 granulopoiesis<sup>6</sup>. Nutritional support from the intestinal microbiota improved hematopoietic  
260 reconstitution in a mouse model<sup>25</sup>. To identify a similar association in our patients, we estimated a  
261 microbiota potency by multiplying the log<sub>10</sub>-relative abundances of microbial genera in a sample with  
262 their corresponding posterior coefficients. We analyzed shotgun metagenomics sequences from 124 of  
263 the samples and observed that samples with positive microbiota potency were associated with  
264 enrichment in cholate degradation and vitamin-B1 synthesis related pathways, as well as butanoate  
265 formation (**Figure S17**). Our findings are in line with evolutionary theory<sup>40</sup> that essential but broadly  
266 available microbial traits such as the production of B vitamins, secondary bile acid metabolism, and  
267 fermentation to short-chain fatty acids<sup>41</sup> could be co-opted by the host's immune system as part of the  
268 homeostatic interplay between immune system and a complex microbiota<sup>42,43</sup>. For example,  
269 *Ruminococcus 2* is a genus that contains *R. bromii*, a keystone species necessary for the efficient  
270 release of energy from complex starch in the normal diet<sup>44</sup>. Reassuringly, the genera  
271 *Faecalibacterium*, *Ruminococcus 2* and *Akkermansia* that we associated with faster rates of white  
272 blood cells (**Figure 3F**) were among those best reconstituted by auto-FMT<sup>23</sup>, potentially explaining  
273 why we found higher counts of neutrophils, monocytes and lymphocytes in patients who received the  
274 auto-FMT (**Figure 2B,C**).

275 The associations we reveal are interpretable as potential effectors on sources and sinks of  
276 white blood cell counts in circulation. Intestinal bacteria may affect white blood cell counts in  
277 circulation by influencing either their sources in the bone marrow or their cytokine profiles<sup>45</sup> and  
278 proliferation rates in the blood, their sinks in different organs, or both. The human immune system in



279 turn can interact with the microbiota and modulate its composition, for example via  
280 immunoglobulin A responses targeting specific bacteria as studied in mice<sup>43,46,47</sup>. To investigate a  
281 reverse effect of the peripheral immune cell system onto bacterial populations, we employed an  
282 analogous approach to the stage 1 analysis of white blood cell dynamics. Dynamics of white blood  
283 cells can be estimated from changes in absolute cell counts, and to obtain the necessary measurements  
284 in absolute bacterial abundances, we measured total bacterial 16S rRNA gene copies per gram of stool  
285 for a subset of our samples (3,995 samples from 481 patients). Using absolute abundances of bacteria  
286 as predictors in addition to medications, we jointly inferred the association network of dynamics  
287 between the gut bacterial ecosystem and the peripheral immune system. All of our patients receive  
288 antibiotics on some days during their treatment<sup>24</sup> and their strong effects on microbiota dynamics  
289 were the dominant effects that survived cross-validated regularized elastic net regression (**Figure**  
290 **S18**). Relaxing the strength of the regularization (methods), however, revealed several bi-directional  
291 relationships between immune cells in circulation and bacterial dynamics in the gut (**Figure S19**). Of  
292 note, we detected a negative association of absolute [*Ruminococcus*] *gnavus* group abundance with  
293 lymphocytes dynamics, confirming our main result based on relative bacterial abundances (**Figure 3**).  
294 In the reverse direction, we saw a positive association of [*Ruminococcus*] *gnavus* group dynamics  
295 with lymphocyte counts. This result agrees with findings that *Ruminococcus gnavus* thrives in and  
296 promotes inflammatory conditions such as Crohn's disease and other inflammatory bowel diseases  
297 (IBD)<sup>48</sup>; our analysis suggests it may drive high neutrophil to lymphocyte ratios that are broadly  
298 characteristic for poor disease outcomes in IBD<sup>49,50</sup> and beyond<sup>51,52</sup>.

299 Overall, our analysis identified that the microbiome is associated with immune cell dynamics  
300 in addition to medications. The effects should be interpreted as net effects since they do not  
301 distinguish, for example, how the microbiota impacts *de novo* hematopoiesis in isolation from its  
302 impact on other sources and sinks. Unlike the plausible role of obligate anaerobe fermenters in  
303 augmenting hematopoiesis via nutritional support<sup>25</sup>, the positive association detected between  
304 *Staphylococcus* and lymphocyte dynamics could instead result from reduced extravasation of T cells  
305 from circulation into the gut epithelium<sup>53</sup>, especially since high abundances of *Staphylococcus* are

306 associated with low gut microbiota diversity ( $p < 0.001$ , **Figure S20**), which indicates a depleted  
307 microbiota.

308 Nevertheless, our approach allows us to leverage the chronology of events and assess  
309 “mathematical causality”<sup>54</sup>. Of course, due to the observational nature of these data there are risks of  
310 confounding that could explain some of the associations found, but the close temporal  
311 correspondence<sup>54</sup> between microbiota and blood cell dynamics, and the validation across cohorts  
312 reduces the number of plausible confounders. Our results, therefore, quite naturally suggest candidate  
313 microbial taxa to manipulate if we seek to steer complex hematopoietic dynamics and utilize the  
314 microbiota as an immunomodulatory component of the human body. Intriguingly, members of  
315 *Faecalibacterium* and *Ruminococcus* in one study<sup>10</sup>, and *Akkermansia* in another<sup>9</sup>, were identified as  
316 enriched in patients with better responses to anti-PD-1 immunotherapy, which suggested a  
317 disagreement between the two studies<sup>55</sup>. Our results, however, revealed *Faecalibacterium*,  
318 *Ruminococcus 2*, and *Akkermansia* as the most strongly associated taxa with increases in white blood  
319 cell counts from one day to the next. Therefore, our results agree with the findings of both anti PD-1  
320 therapy studies that these taxa are associated with immune modulation in humans. Our results also  
321 allow us to compare the potency of manipulating these intestinal commensals to that of  
322 immunomodulatory drugs. While these genera are common in the gut microbiota of healthy people<sup>17</sup>,  
323 the relative abundance of each genus can drop below detection in our patients during the intestinal  
324 damage related to HCT<sup>24</sup>. Therefore, realistic ranges of 3-5 orders of magnitude in bacterial log-  
325 relative abundances (**Figure 3G, S21**) can yield effect sizes similar to that of homeostatic feedbacks  
326 between white blood cells and several immunomodulatory medications (e.g. a change in  
327 *Ruminococcus 2* from below detection to 1% relative abundance associated with a +67% and +63%  
328 increases in neutrophil and lymphocyte rates, respectively). Therefore, while the effect sizes of  
329 intestinal bacteria at first may appear smaller than those of immunomodulatory drugs, the herein  
330 estimated homeostatic effects of gut bacteria may not be that small since their coefficients refer to  
331 changes in exponential rates of white blood cells and accumulate each day. To better demonstrate how  
332 this accumulation of effects would work, we conducted simulations of the inferred dynamic system of  
333 white blood cells using our posterior coefficient distributions (methods). We simulated 1,000 time

334 series for microbiota compositions either chosen from the 100 samples highest or lowest in  
335 *Faecalibacterium*, *Ruminococcus 2* and *Akkermansia* (**Figure 3G**), in presence (**Figure 3H**) or  
336 absence (**Figure 3I**) of GCSF administration. Simulations predict that a microbiota enriched in these  
337 genera could accelerate immune reconstitution, and reduce the time until neutrophils reach  $>2K*\mu l^{-1}$   
338 in absence of GCSF by 2.4 days, from predicted 6.8 (CI: [6.5, 7]) to 4.4 days (CI: [4.3,4.5]) days. Gut  
339 bacteria, in concert and over time, could therefore have significant impact on systemic immunity even  
340 in individuals with less severely injured microbiomes.

341 In sum, our work links the gut microbiota to the dynamics of the human immune system via  
342 peripheral white blood cell populations. Our analysis uses white blood cells counted directly from  
343 patients, which are coarse-grained clinical analyses conducted at large scale but lack details such as  
344 lymphocyte and other immune cell subsets. Nonetheless, because it is in humans, this study fills an  
345 important gap at a critical time for microbiome research when the clinical relevance of animal models  
346 of microbiome-immune interaction has been questioned<sup>21</sup>. By studying a large number of patients  
347 over time, we were able to infer and quantify for the first time the association of microbiota  
348 components on systemic immune cell dynamics, and our results help to consolidate previous  
349 findings<sup>10,9</sup> that seemed in conflict with each other<sup>55</sup>. Our study demonstrates that the composition of  
350 the microbiota does indeed modulate systemic immune cell dynamics, a link that could be used in the  
351 future to improve immunotherapy and help identify microbiota treatments for inflammatory  
352 diseases<sup>9,10,56-60</sup>.

353

354

355

356 **Bibliography**

357

- 358 1. Mazmanian, S. K., Liu, C. H., Tzianabos, A. O. & Kasper, D. L. An immunomodulatory  
359 molecule of symbiotic bacteria directs maturation of the host immune system. *Cell* **122**,  
360 107–118 (2005).
- 361 2. Gomez de Agüero, M. *et al.* The maternal microbiota drives early postnatal innate  
362 immune development. *Science* **351**, 1296–1302 (2016).
- 363 3. Sonnenberg, G. F. & Artis, D. Novel connections and precision approaches. *Nat. Rev.*  
364 *Immunol.* **19**, 75–76 (2019).
- 365 4. Geva-Zatorsky, N. *et al.* Mining the human gut microbiota for immunomodulatory  
366 organisms. *Cell* **168**, 928–943.e11 (2017).
- 367 5. Tan, T. G. *et al.* Identifying species of symbiont bacteria from the human gut that, alone,  
368 can induce intestinal Th17 cells in mice. *Proc. Natl. Acad. Sci. USA* **113**, E8141–E8150  
369 (2016).
- 370 6. Balmer, M. L. *et al.* Microbiota-derived compounds drive steady-state granulopoiesis via  
371 MyD88/TICAM signaling. *J. Immunol.* **193**, 5273–5283 (2014).
- 372 7. Deshmukh, H. S. *et al.* The microbiota regulates neutrophil homeostasis and host  
373 resistance to *Escherichia coli* K1 sepsis in neonatal mice. *Nat. Med.* **20**, 524–530 (2014).
- 374 8. Tanoue, T. *et al.* A defined commensal consortium elicits CD8 T cells and anti-cancer  
375 immunity. *Nature* **565**, 600–605 (2019).
- 376 9. Routy, B. *et al.* Gut microbiome influences efficacy of PD-1-based immunotherapy  
377 against epithelial tumors. *Science* **359**, 91–97 (2018).
- 378 10. Gopalakrishnan, V. *et al.* Gut microbiome modulates response to anti-PD-1  
379 immunotherapy in melanoma patients. *Science* **359**, 97–103 (2018).
- 380 11. Vétizou, M. *et al.* Anticancer immunotherapy by CTLA-4 blockade relies on the gut  
381 microbiota. *Science* **350**, 1079–1084 (2015).
- 382 12. Matson, V. *et al.* The commensal microbiome is associated with anti-PD-1 efficacy in  
383 metastatic melanoma patients. *Science* **359**, 104–108 (2018).
- 384 13. Atarashi, K. *et al.* ATP drives lamina propria T(H)17 cell differentiation. *Nature* **455**,  
385 808–812 (2008).
- 386 14. Ivanov, I. I. *et al.* Specific microbiota direct the differentiation of IL-17-producing T-  
387 helper cells in the mucosa of the small intestine. *Cell Host Microbe* **4**, 337–349 (2008).
- 388 15. Cahenzli, J., Köller, Y., Wyss, M., Geuking, M. B. & McCoy, K. D. Intestinal microbial  
389 diversity during early-life colonization shapes long-term IgE levels. *Cell Host Microbe*  
390 **14**, 559–570 (2013).
- 391 16. Lloyd-Price, J. *et al.* Multi-omics of the gut microbial ecosystem in inflammatory bowel  
392 diseases. *Nature* **569**, 655–662 (2019).
- 393 17. Integrative HMP (iHMP) Research Network Consortium. The integrative human  
394 microbiome project. *Nature* **569**, 641–648 (2019).
- 395 18. Olin, A. *et al.* Stereotypic immune system development in newborn children. *Cell* **174**,  
396 1277–1292.e14 (2018).
- 397 19. Brandi, G. & Frega, G. Microbiota: Overview and Implication in Immunotherapy-Based  
398 Cancer Treatments. *Int. J. Mol. Sci.* **20**, (2019).
- 399 20. Xin Yu, J., Hubbard-Lucey, V. M. & Tang, J. The global pipeline of cell therapies for  
400 cancer. *Nat. Rev. Drug Discov.* **18**, 821–822 (2019).
- 401 21. Walter, J., Armet, A. M., Finlay, B. B. & Shanahan, F. Establishing or Exaggerating

- 402 Causality for the Gut Microbiome: Lessons from Human Microbiota-Associated  
403 Rodents. *Cell* **180**, 221–232 (2020).
- 404 22. Taur, Y. *et al.* Intestinal domination and the risk of bacteremia in patients undergoing  
405 allogeneic hematopoietic stem cell transplantation. *Clin. Infect. Dis.* **55**, 905–914 (2012).
- 406 23. Taur, Y. *et al.* Reconstitution of the gut microbiota of antibiotic-treated patients by  
407 autologous fecal microbiota transplant. *Sci. Transl. Med.* **10**, (2018).
- 408 24. Morjaria, S. *et al.* Antibiotic-Induced Shifts in Fecal Microbiota Density and  
409 Composition during Hematopoietic Stem Cell Transplantation. *Infect. Immun.* **87**,  
410 (2019).
- 411 25. Staffas, A. *et al.* Nutritional Support from the Intestinal Microbiota Improves  
412 Hematopoietic Reconstitution after Bone Marrow Transplantation in Mice. *Cell Host*  
413 *Microbe* **23**, 447–457.e4 (2018).
- 414 26. Taur, Y. *et al.* The effects of intestinal tract bacterial diversity on mortality following  
415 allogeneic hematopoietic stem cell transplantation. *Blood* **124**, 1174–1182 (2014).
- 416 27. Savani, B. N. *et al.* Absolute lymphocyte count on day 30 is a surrogate for robust  
417 hematopoietic recovery and strongly predicts outcome after T cell-depleted allogeneic  
418 stem cell transplantation. *Biol. Blood Marrow Transplant.* **13**, 1216–1223 (2007).
- 419 28. Mehta, R. S. & Rezvani, K. Immune reconstitution post allogeneic transplant and the  
420 impact of immune recovery on the risk of infection. *Virulence* **7**, 901–916 (2016).
- 421 29. Kim, H. T. *et al.* Absolute lymphocyte count recovery after allogeneic hematopoietic  
422 stem cell transplantation predicts clinical outcome. *Biol. Blood Marrow Transplant.* **21**,  
423 873–880 (2015).
- 424 30. Scheiermann, C., Frenette, P. S. & Hidalgo, A. Regulation of leucocyte homeostasis in  
425 the circulation. *Cardiovasc. Res.* **107**, 340–351 (2015).
- 426 31. Thompson, P. A. *et al.* Umbilical cord blood graft engineering: challenges and  
427 opportunities. *Bone Marrow Transplant.* **50 Suppl 2**, S55-62 (2015).
- 428 32. Gabrilove, J. L. *et al.* Effect of granulocyte colony-stimulating factor on neutropenia and  
429 associated morbidity due to chemotherapy for transitional-cell carcinoma of the  
430 urothelium. *N. Engl. J. Med.* **318**, 1414–1422 (1988).
- 431 33. Belkaid, Y. & Hand, T. W. Role of the microbiota in immunity and inflammation. *Cell*  
432 **157**, 121–141 (2014).
- 433 34. Hall, M. W. *et al.* Inter-personal diversity and temporal dynamics of dental, tongue, and  
434 salivary microbiota in the healthy oral cavity. *npj Biofilms and Microbiomes* **3**, 2 (2017).
- 435 35. Ramanan, P., Barreto, J. N., Osmon, D. R. & Tosh, P. K. Rothia bacteremia: a 10-year  
436 experience at Mayo Clinic, Rochester, Minnesota. *J. Clin. Microbiol.* **52**, 3184–3189  
437 (2014).
- 438 36. Ulven, T. Short-chain free fatty acid receptors FFA2/GPR43 and FFA3/GPR41 as new  
439 potential therapeutic targets. *Front. Endocrinol. (Lausanne)* **3**, 111 (2012).
- 440 37. Smith, P. M. *et al.* The microbial metabolites, short-chain fatty acids, regulate colonic  
441 Treg cell homeostasis. *Science* **341**, 569–573 (2013).
- 442 38. Hergott, C. B. *et al.* Peptidoglycan from the gut microbiota governs the lifespan of  
443 circulating phagocytes at homeostasis. *Blood* **127**, 2460–2471 (2016).
- 444 39. Ladinsky, M. S. *et al.* Endocytosis of commensal antigens by intestinal epithelial cells  
445 regulates mucosal T cell homeostasis. *Science* **363**, (2019).
- 446 40. Foster, K. R., Schluter, J., Coyte, K. Z. & Rakoff-Nahoum, S. The evolution of the host  
447 microbiome as an ecosystem on a leash. *Nature* **548**, 43–51 (2017).
- 448 41. Yoshii, K., Hosomi, K., Sawane, K. & Kunisawa, J. Metabolism of dietary and microbial  
449 vitamin B family in the regulation of host immunity. *Front. Nutr.* **6**, 48 (2019).
- 450 42. Zaza, G. *et al.* Impact of maintenance immunosuppressive therapy on the fecal  
451 microbiome of renal transplant recipients: Comparison between an everolimus- and a



- 452 standard tacrolimus-based regimen. *PLoS One* **12**, e0178228 (2017).
- 453 43. McLoughlin, K., Schluter, J., Rakoff-Nahoum, S., Smith, A. L. & Foster, K. R. Host  
454 selection of microbiota via differential adhesion. *Cell Host Microbe* **19**, 550–559 (2016).
- 455 44. Ze, X., Duncan, S. H., Louis, P. & Flint, H. J. *Ruminococcus bromii* is a keystone  
456 species for the degradation of resistant starch in the human colon. *ISME J.* **6**, 1535–1543  
457 (2012).
- 458 45. Schirmer, M. *et al.* Linking the human gut microbiome to inflammatory cytokine  
459 production capacity. *Cell* **167**, 1125–1136.e8 (2016).
- 460 46. Hooper, L. V., Littman, D. R. & Macpherson, A. J. Interactions between the microbiota  
461 and the immune system. *Science* **336**, 1268–1273 (2012).
- 462 47. Palm, N. W. *et al.* Immunoglobulin A coating identifies colitogenic bacteria in  
463 inflammatory bowel disease. *Cell* **158**, 1000–1010 (2014).
- 464 48. Henke, M. T. *et al.* *Ruminococcus gnavus*, a member of the human gut microbiome  
465 associated with Crohn’s disease, produces an inflammatory polysaccharide. *Proc. Natl.*  
466 *Acad. Sci. USA* **116**, 12672–12677 (2019).
- 467 49. Okba, A. M. *et al.* Neutrophil/lymphocyte ratio and lymphocyte/monocyte ratio in  
468 ulcerative colitis as non-invasive biomarkers of disease activity and severity. *Auto*  
469 *Immun. Highlights* **10**, 4 (2019).
- 470 50. Celikbilek, M. *et al.* Neutrophil-lymphocyte ratio as a predictor of disease severity in  
471 ulcerative colitis. *J Clin Lab Anal* **27**, 72–76 (2013).
- 472 51. Gao, Y. *et al.* Neutrophil/lymphocyte ratio is a more sensitive systemic inflammatory  
473 response biomarker than platelet/lymphocyte ratio in the prognosis evaluation of  
474 unresectable pancreatic cancer. *Oncotarget* **8**, 88835–88844 (2017).
- 475 52. Choi, S.-J. *et al.* High neutrophil-to-lymphocyte ratio predicts short survival duration in  
476 amyotrophic lateral sclerosis. *Sci. Rep.* **10**, 428 (2020).
- 477 53. Fu, Y.-Y. *et al.* T Cell Recruitment to the Intestinal Stem Cell Compartment Drives  
478 Immune-Mediated Intestinal Damage after Allogeneic Transplantation. *Immunity* **51**,  
479 90–103.e3 (2019).
- 480 54. Gerber, G. K. The dynamic microbiome. *FEBS Lett.* **588**, 4131–4139 (2014).
- 481 55. Jobin, C. Precision medicine using microbiota. *Science* **359**, 32–34 (2018).
- 482 56. Zitvogel, L., Ma, Y., Raoult, D., Kroemer, G. & Gajewski, T. F. The microbiome in  
483 cancer immunotherapy: Diagnostic tools and therapeutic strategies. *Science* **359**, 1366–  
484 1370 (2018).
- 485 57. Hsiao, E. Y. *et al.* Microbiota modulate behavioral and physiological abnormalities  
486 associated with neurodevelopmental disorders. *Cell* **155**, 1451–1463 (2013).
- 487 58. Lakritz, J. R. *et al.* Gut bacteria require neutrophils to promote mammary tumorigenesis.  
488 *Oncotarget* **6**, 9387–9396 (2015).
- 489 59. Lakritz, J. R. *et al.* Beneficial bacteria stimulate host immune cells to counteract dietary  
490 and genetic predisposition to mammary cancer in mice. *Int. J. Cancer* **135**, 529–540  
491 (2014).
- 492 60. Chen, H. *et al.* A forward chemical genetic screen reveals gut microbiota metabolites  
493 that modulate host physiology. *Cell* **177**, 1217–1231.e18 (2019).
- 494 61. Caporaso, J. G. *et al.* Ultra-high-throughput microbial community analysis on the  
495 Illumina HiSeq and MiSeq platforms. *ISME J.* **6**, 1621–1624 (2012).
- 496 62. Callahan, B. J. *et al.* DADA2: High-resolution sample inference from Illumina amplicon  
497 data. *Nat. Methods* **13**, 581–583 (2016).
- 498 63. Murali, A., Bhargava, A. & Wright, E. S. IDTAXA: a novel approach for accurate  
499 taxonomic classification of microbiome sequences. *Microbiome* **6**, 140 (2018).
- 500 64. Quast, C. *et al.* The SILVA ribosomal RNA gene database project: improved data  
501 processing and web-based tools. *Nucleic Acids Res.* **41**, D590-6 (2013).

- 502 65. Pinheiro, J. C., Bates, D. M., DebRoy, S. S. & Sarkar, D. *Nlme: Linear and Nonlinear*  
503 *Mixed Effects Models*. (2013).
- 504 66. Tibshirani, R. Regression shrinkage and selection via the lasso. *Journal of the Royal*  
505 *Statistical Society: Series B (Methodological)* **58**, 267–288 (1996).
- 506 67. Pedregosa, F. *et al.* Scikit-learn: Machine Learning in Python. *Journal of Machine*  
507 *Learning Research* (2011).
- 508 68. Salvatier, J., Wiecki, T. V. & Fonnesbeck, C. Probabilistic programming in Python using  
509 PyMC3. *PeerJ Computer Science* **2**, e55 (2016).
- 510 69. Hoffman, M. D. & Gelman, A. The No-U-Turn Sampler: Adaptively Setting Path  
511 Lengths in Hamiltonian Monte Carlo. *Journal of Machine Learning Research* (2014).
- 512 70. Franzosa, E. A. *et al.* Species-level functional profiling of metagenomes and  
513 metatranscriptomes. *Nat. Methods* **15**, 962–968 (2018).
- 514 71. Vehtari, A., Gelman, A., Simpson, D., Carpenter, B. & Bürkner, P.-C. Rank-  
515 normalization, folding, and localization: An improved  $\widehat{R}$  for assessing  
516 convergence of MCMC. *arXiv* (2019).
- 517
- 518

519 **Supplementary Information**

520 Appended and available online.

521

522 **Acknowledgments and Conflicts of Interest**

523 We thank Marc Lipsitch, Sandra B. Andersen, Kevin R. Foster, Jonathan Kevin Sia, Eric G. Pamer,  
524 Kat Coyte, Sibylle Mitschka and the members of the Xavier lab for helpful discussion and comments  
525 on the manuscript. This work was supported by the National Institutes of Health (NIH) grant U01  
526 AI124275 to JBX and grant R01 AI137269 to JBX, by the MSKCC Cancer Center Core Grant P30  
527 CA008748, the Parker Institute for Cancer Immunotherapy at Memorial Sloan Kettering Cancer  
528 Center, the Sawiris Foundation, the Society of Memorial Sloan Kettering Cancer Center, MSKCC  
529 Cancer Systems Immunology Pilot Grant and Empire Clinical Research Investigator Program. MS  
530 received funding from the Burroughs Wellcome Fund Postdoctoral Enrichment Program, the Damon  
531 Runyon Physician-Scientist Award, and the Robert Wood Johnson Foundation. MRMvdB and JUP  
532 received financial support from Seres Therapeutics. TMH is investigator in the Pathogenesis of  
533 Infectious Diseases from the Burroughs Wellcome Fund, and funded via an award from Geoffrey  
534 Beene Foundation, and NIH RO1 AI093808. M-AP has received honoraria from AbbVie, Bellicum,  
535 Bristol-Myers Squibb, Incyte, Merck, Novartis, Nektar Therapeutics, and Takeda; has received  
536 research support for clinical trials from Incyte, Kite (Gilead) and Miltenyi Biotec; and serves on data  
537 and safety monitoring boards for Servier and Medigene and scientific advisory boards for MolMed  
538 and NexImmune. The funders had no role in study design, data collection and analysis, decision to  
539 publish, or preparation of the manuscript.

540

541 **Author Contributions**

542 J.S. and J.B.X. wrote the manuscript. J.S. and J.B.X. designed the analyses with expert help from  
543 R.N., J.U.P. and Y.T. contributed to the clinical data preparation, B.P.T. provided the 16S data  
544 processing pipelines, A.D. provided the shotgun processing pipelines. All authors contributed to the  
545 writing and interpretation of the results.



546 **SUPPLEMENTARY INFORMATION**

547 **Methods**

548 **Complete blood count collection and characterization**

549 Absolute white blood cells count data were obtained from routine complete blood counts ordered by  
550 clinicians during normal clinical practice, used to obtain informative diagnostic and monitoring  
551 information. Blood samples received in the clinical hematology laboratory were analyzed using  
552 Sysmex XN automated hematology analyzers (Sysmex, Lincolnshire, IL) and, when needed based on  
553 specific flags and parameters as per MSKCC standard operating procedures, were validated manually  
554 using the Sysmex DI-60 Slide Processing System or CellaVision DM9600 Automated Digital  
555 Morphology System (Sysmex, Lincolnshire, IL).

556

557 **16S rRNA gene amplification and multiparallel sequencing**

558 For each sample, duplicate 50- $\mu$ l PCRs were performed, each containing 50 ng of purified DNA, 0.2  
559 mM deoxynucleotide triphosphates, 1.5 mM MgCl<sub>2</sub>, 2.5 U Platinum Taq DNA polymerase, 2.5  $\mu$ l of  
560 10 $\times$  PCR buffer, and 0.5  $\mu$ M of each primer designed to amplify the V4-V5: 563F (5'-nnnnnnnnn-  
561 NNNNNNNNNNNN-AYTGGGYDTAAAGNG-3') and 926R (5'-nnnnnnnnn-NNNNNNNNNNNNN-  
562 CCGTCAATTYHTTTRAGT-3'). A unique 12-base Golay barcode (Ns) precedes the primers for  
563 sample identification<sup>61</sup>, and one to eight additional nucleotides were placed in front of the barcode to  
564 offset the sequencing of the primers. Cycling conditions were 94°C for 3 min, followed by 27 cycles  
565 of 94°C for 50 s, 51°C for 30 s, and 72°C for 1 min. For the final elongation step, 72°C for 5 min was  
566 used. Replicate PCRs were pooled, and amplicons were purified using the QIAquick PCR Purification  
567 Kit (Qiagen). PCR products were quantified and pooled at equimolar amounts before Illumina  
568 barcodes and adaptors were ligated, using the Illumina TruSeq Sample Preparation protocol. The  
569 completed library was sequenced on an Illumina MiSeq platform following the Illumina  
570 recommended procedures with a paired-end 250  $\times$  250 bp kit

571

572 **Sequence analysis**

573 The 16S (V4-V5) paired-end reads were merged and demultiplexed. Amplicon sequence variants  
574 (ASVs) were identified using the Divisive Amplicon Denoising Algorithm (DADA2) pipeline  
575 including filtering and trimming of the reads<sup>62</sup>. Reads were trimmed to the first 180 bp or the first  
576 point with a quality score  $Q < 2$ . Reads were removed if they contained ambiguous nucleotides (N) or  
577 if two or more errors were expected based on the quality of the trimmed read. We assigned taxonomy  
578 to ASVs using a 8-mer based classifier trained by IDTaxa<sup>63</sup> using the SILVA database<sup>64</sup>. We  
579 determined the copy number of 16S rRNA genes per gram of stool for 4,158 of our samples as  
580 reported previously<sup>24</sup>, by quantitative PCR on total DNA extracted from fecal samples.

581

582 **Quantification of total microbiota density per gram of stool and estimation of total genus**  
583 **abundances.**

584 Quantitative PCR (qPCR) was performed on DNA extracted from the 1g wet weight of a stool sample  
585 using DyNAmo SYBR Green qPCR kit (Finnzymes) and 0.2  $\mu$ M of the universal bacterial primer 8F  
586 (5'-AGAGTTTGATCCTGGCTCAG) and the broad-range bacterial primer 338R  
587 (5'-TGCTGCCTCCCGTAGGAGT-3'). Standard curves were prepared by serial dilution of the PCR  
588 blunt vector (Invitrogen) containing 1 copy of the 16s rRNA gene. Cycling conditions were 95°C for  
589 10 minutes followed by 40 cycles of 95°C for 30 seconds, 52°C for 30 seconds, and 72°C for 1  
590 minute. We used the measurements of total 16S rRNA gene counts per gram of stool to multiply the  
591 relative abundances of taxa obtained from 16S amplicon sequencing to obtain the estimate of their  
592 total abundance per gram of stool (supplementary methods). Importantly, this does not account for  
593 16S copy number variation between taxa, but the observed dynamic ranges in total abundances of taxa  
594 in our data set span up to 9 orders of magnitude, exceeding the potential inaccuracies due to copy  
595 number variation.

596

597 **Diversity calculations**

598 Microbiome alpha-diversity was measured by the inverse Simpson (IS) index of a sample. It was  
599 calculated by  $IS_i = \frac{1}{\sum_{j=1}^N p_{ij}^2}$ , where  $p$  is the relative abundance of the  $j$ th ASV out of  $N$  total ASVs in  
600 sample  $i$ .

601

### 602 **Linear mixed-effects model of white blood cell counts**

603 To study the effect of auto-FMT on white blood cells, we investigated the white blood cell counts of  
604 24 enrolled patients of this trial from the day of neutrophil engraftment until 100 days after. FMT  
605 occurred on different days relative to neutrophil engraftment. Thus, we performed an analogous  
606 analysis to that conducted in the original publication that demonstrated how FMT re-established a  
607 diverse microbiome in the post-FMT period<sup>23</sup>. To answer if white blood cell counts differed post-  
608 FMT, we used a linear mixed effects model of white blood cell counts,  $y$ , modeled as a function of the  
609 FMT treatment as well as patient and timepoint specific random effects. We included random  
610 intercept terms for each day  $i$  and each patient  $j$ , and a fixed effects term for the post-FMT period with  
611 associated coefficient “armpost”, using the indicator variable “FMT”, that is 1 when a patient was  
612 from the FMT treated arm of the trial and  $day$  was greater than or equal to the day of the FMT  
613 procedure. We conducted independent analyses for neutrophil, lymphocyte and monocyte counts.  
614 This resulted in the following model of a cell count,  $y$ , for patient  $j$  on day  $i$ :

$$615 \quad y_{ij} = \beta_0 + \text{armpost} * \text{FMT}_{ij} + \text{day}_i + \text{patient}_j + \varepsilon_{ij}, \quad i = 0, \dots, D, j = 1, \dots, P$$

616 with prior distributions  $\text{day}_i \sim \mathcal{N}(0, \sigma_{\text{day}}^2)$ , and  $\text{patient}_j \sim \mathcal{N}(0, \sigma_{\text{patient}}^2)$ , independent error  
617  $\varepsilon_{ij} \sim \mathcal{N}(0, \sigma^2)$  and fixed intercept  $\beta_0$ , for the  $D$  days post neutrophils engraftment and  $P$  patients,  
618 ( $D=100, P=24$ ). For convenience of those interested in reanalyzing our data, the part of our data  
619 concerning the auto-FMT analysis is available in tidy format (supplementary data 11), and the  
620 analysis code conducted in the R programming language is available as an exported notebook  
621 (fmt\_effect\_on\_wbc.pdf) on github: [https://github.com/jsevo/wbcdynamics\\_microbiome/](https://github.com/jsevo/wbcdynamics_microbiome/).<sup>65</sup> We  
622 conducted an additional analysis with “day” as a continuous predictor which did not change our  
623 conclusions (supplementary methods).

624

## 625 **Dynamic systems analyses**

626 We analyzed factors associated with the observed changes of absolute counts of neutrophils,  
627 lymphocytes and monocytes between two days. In the following we describe how chronology of  
628 events and biological samples were encoded, and the models used to infer a role of medications,  
629 clinical parameters and the microbiome on dynamics of white blood cells.

630 To reveal factors that associate with day-to-day changes in white blood cell counts, we started  
631 from a first-order differential equation of white blood cell (W) dynamics:

$$632 \quad \frac{d(W)}{dt} = W(gr + \sum_{j=1}^P \beta_j X_j)$$

633 Where  $gr$  represents the intercept, i.e. the base line rate of change during immune reconstitution, and  
634  $\beta_j$  are the to-be-estimated coefficients of the  $P$  predictors  $X_j, j \in P$ , of the white blood cell dynamics.

635 This equation was then linearized to

$$636 \quad \frac{d \ln(W)}{dt} = gr + \sum_{j=1}^P \beta_j X_j$$

637 And we parameterized the corresponding discrete difference equation:

$$638 \quad \frac{\Delta \ln(W)}{\Delta t} = gr + \sum_{j=1}^P \beta_j X_j$$

639 where  $\Delta \ln(W)$  is the log-difference between single days of neutrophils, lymphocytes or monocytes  
640 counts, and  $\Delta t=1$  for all intervals. Predictors include the counts of neutrophils, lymphocytes,  
641 monocytes, eosinophils and platelets during an interval (homeostatic feedbacks), immunomodulatory  
642 medication and clinical observations such as a blood stream infection and the onset of graft versus  
643 host disease, HCT parameters such as graft types and conditioning regimens, and, additionally, the  
644 microbiota composition in “stage 2” of our analysis (supplementary methods for data exclusion and  
645 additional details on interval definitions). Importantly, by parameterizing a dynamic equation and  
646 analyzing *rates of change*, our coefficient estimates have an immediate causal interpretation within  
647 our modeling framework (i.e. a  $\beta_j > 0$  implies that higher levels of the corresponding  $X_j$  *increases* the

648 respective white blood cell type,  $W$ ). To differentiate such results from other associations, analyses of  
649 this type have been termed “mathematical causality”<sup>54</sup>.

650

651 *Stage 1 analysis: Feature selection. Identifying medications and clinical observations associated with*  
652 *white blood cell dynamics from patients without microbiome data*

653 Stage 1 uses data of patients without any available microbiome samples and the following model of  
654 white blood cell changes,  $y$ :

$$655 \quad y = gr + \sum_{j=1}^p \beta_j X_j,$$

656 with intercept,  $gr$ . The predictors,  $X$ , include dummy variables for the HCT graft type, patients’ age on  
657 the date of HCT, sex, 13 most frequently observed positive blood cultures with remaining other blood  
658 stream infections grouped into a separate category “other infections”, an indicator for the onset of  
659 graft versus host disease, administrations of 55 different, most common immunomodulatory  
660 medications and platelet transfusion events, and HCT conditioning intensity regimens as well as the  
661 log-transformed geometric mean counts of neutrophils, lymphocytes, monocytes, eosinophils and  
662 platelets during the respective interval. We used elastic net regression<sup>66</sup> for feature selection using the  
663 sklearn package for the Python programming language<sup>67</sup>. For elastic net regression with 50% L1-  
664 penalty, predictors were scaled between zero and 1, and we used 10-fold cross validation (i.e. leaving  
665 out 10% of patients at each cross-validation step) to choose the regularization strength,  $\lambda$ , solving for

$$666 \quad \operatorname{argmin}_{gr, \beta} \left\{ \frac{1}{2N} \sum_{i=1}^N (y_i - gr - \sum_{j=1}^p x_{ij} \beta_j)^2 + \frac{1}{2} \lambda \sum_{j=1}^p |\beta_j| + \frac{1}{2} \lambda \sum_{j=1}^p \beta_j^2 \right\}$$

667  
668 Stage 1 yielded a sparse coefficient matrix of predictors used to design the model in stage 2.

669

670 *Expanded analysis on patients with microbiome data – stage 2*

671 To identify associations between microbiota and white blood cell dynamics, we conducted an  
672 analogous, Bayesian regression using the package PyMC3 for the Python programming language<sup>68</sup>.  
673 Stage 1 identified important difference between transplant types, and we therefore stratified our data  
674 into 4 cohorts according to their stem cell graft source. Using data independently from each cohort,

675 we applied “no U-turn” sampling<sup>69</sup> to produce 10,000 posterior samples from 5 independent MCMC  
676 chains that parameterized the model:

$$677 \quad y \sim \mathcal{N}(\mu, \sigma^2)$$

$$678 \quad \mu = gr + \sum_{j=1}^{\hat{P}} x_j \beta_j$$

679 with uninformative prior distributions

$$680 \quad gr \sim \mathcal{N}(\text{mean} = 0, \text{standard deviation} = 100)$$

$$681 \quad \beta_j \sim \mathcal{N}(\text{mean} = 0, \text{standard deviation} = 100)$$

$$682 \quad \sigma \sim \text{HalfCauchy}(\text{beta} = 2)$$

683 where  $y$  is the observed daily change of a focal white blood cell type as in stage 1 with normal  
684 distributed mean,  $\mu$ , and  $\sigma$ , the model uncertainty with a thick-tailed half Cauchy prior (importantly,  
685 our posterior estimates do not depend on this choice as we obtain the same results with an inverse  
686 Gamma prior, figure S19).  $\mu$  was a function of the baseline growth rate,  $gr$ , and predictors,  $\hat{P}$ :  
687 medications with non-zero coefficients in stage 1, the white blood cell counts, patient age and sex,  
688 and HCT conditioning intensities; additionally,  $\hat{P}$  now included the log-abundances of microbial  
689 genera as measured by 16S sequencing from DNA in the stool collected on the second day of a daily  
690 interval (see supplementary methods for details). We considered taxa that were among the 100 most  
691 abundant, or had reached maximum relative abundances of at least 10%, and selected those who were  
692 non-zero in more than 75% of our samples. White blood cell counts and microbiota data present  
693 during a daily interval were log-transformed, and zeros were filled with half of the minimum observed  
694 non zero counts (i.e.  $0.5e3$  and  $2e-6$ , respectively). We focused on the largest cohort (PBSC) and  
695 used the independent inference results from TCD, BM, and cord cohorts for validation.

696

#### 697 *Validation score*

698 Coefficients learnt from the PBSC patient cohort were assigned a “validation score” based on the  
699 results obtained from the other three MSK patient cohorts. Our requirements for validation were  
700 conservative; we required evidence from our validation data sets as well as absence of counter

701 evidence. For regression results from each of the validation graft type cohorts, i.e. TCD, BM, and  
702 cord, we checked if a coefficient had more than 75% probability (50%HPDI) to have the same sign as  
703 the mean of the PBSC coefficient posterior for a given predictor. If so, this was considered evidence  
704 of validation, and we summed the evidence over the three validation sets (i.e. maximum score of 3, 1  
705 from each of TCD, BM, and cord cohorts). Conversely, if we found more than 75% probability  
706 among any of the validation data sets that a given predictor had the *opposite* sign as the posterior  
707 mean calculated from PBSC data, this was considered counter evidence and the validation score was  
708 always set to zero.

709

710 *Analysis of white blood cell dynamics with absolute bacterial abundances as predictors instead of*  
711 *relative abundances*

712 We conducted an ordinary least squares regression using the statsmodels package in the Python  
713 programming language of the same model as in the main Bayesian analysis using total bacterial  
714 abundances as predictors. This was only possible on a subset of 389 neutrophil, 331 lymphocyte and  
715 376 monocyte rate observations from PBSC patients.

716

717 *Forwards simulation of predicted immune system reconstitution kinetics*

718 To assess the impact of the estimated microbiota coefficients on immune system dynamics, we  
719 conducted 1,000 simulations of the system of 3 differential equations describing the dynamics of  
720 neutrophils, lymphocytes and monocytes. We ran 1,000 simulations four times: in presence and  
721 absence of GCSF, each with microbiota compositions enriched or depleted in *Faecalibacterium*,  
722 *Ruminococcus 2* and *Akkermansia*. To identify these compositions, we ranked the observed  
723 microbiota compositions by these taxa, and chose randomly either from the top or bottom 100. The  
724 coefficients for white blood cell interactions, interactions with the microbiota and the effect of GCSF  
725 were sampled from our posterior coefficient distributions. Using these coefficients sampled at the start  
726 of the simulation, and using 50 cells\* $\mu\text{l}^{-1}$  of neutrophils, lymphocytes and monocytes as initial values,  
727 we simulated these differential equations forwards in time using the odeint function of the scipy  
728 package for the Python programming language.

729

730 *Validation on data from Duke University*

731 We analyzed 9,603 blood samples with 25,581 associated administrations of immunomodulatory  
 732 medications, and 741 microbiota samples from Duke as an orthogonal data set to validate our  
 733 findings. The temporal resolution of this data was much lower, and after filtering for samples from the  
 734 relevant post neutrophil engraftment period, and by requiring daily intervals, 83 valid, complete data  
 735 points were available. Using these data, we correlated daily blood cell changes individually in  
 736 univariate, or jointly in a partial least squares regression, with those predictors that achieved more  
 737 than 95% probability density in the positive or negative domain in the PBSC data regression. For each  
 738 of these predictors, we present the sign of slopes and Bonferroni corrected  $p$ -values from individual  
 739 linear regressions.

740

741 *Joint analysis of the effect of antibiotics and white blood cell counts on the microbiota and the*  
 742 *microbiota and immunomodulatory medications on white blood cell counts*

743 Analogous to *stage 1*, we performed cross-validated, regularized linear regressions (ElasticNet) using  
 744 the scikit-learn package for the Python programming language to jointly estimate the association  
 745 network between microbiota and circulatory white blood cells. For this, we constructed a block matrix  
 746  $\mathbf{X}$  of predictor matrices  $\mathbf{X}_i$  that include the absolute bacterial abundances, drug data (antibiotics for  
 747 bacterial dynamics and immune modulators for white blood cell dynamics), as well as the counts of  
 748 white blood cells and a separate intercept term per block. Each block  $\mathbf{X}_{n_l, p_l}^l$ , with  $n_l$  observations and  $p_l$   
 749 predictors ( $l=0\dots k$ ), on the diagonal of  $\mathbf{X}$  corresponds to the indices of the observed daily log-changes  
 750 of one of the 41 bacterial genera considered in our main analysis or the log changes in neutrophil,  
 751 lymphocyte and monocyte counts from PBSC patients contained in  $\mathbf{Y}$  (in total we calculated 15,833  
 752 rates from 256 patients). Our regression problem can thus be written as:

$$753 \quad \underset{\beta}{\operatorname{argmin}} (\mathbf{Y} - \mathbf{X}\beta) \quad \text{where } \mathbf{X} = \begin{matrix} \mathbf{X}_{n_0, p_0}^0 & \cdots & \mathbf{0}_{n_0, p_k} \\ \vdots & \ddots & \vdots \\ \mathbf{0}_{n_k, p_0} & \cdots & \mathbf{X}_{n_k, p_k}^k \end{matrix}$$

754 with  $k=44$ , i.e. 41 bacterial genera and 3 white blood cell types, the to-be estimated coefficient vector  
 755  $\beta$  and  $\mathbf{0}$  the zero matrix. This system is underdetermined and we therefore chose the same approach as



756 in stage 1, elastic net regression, for feature selection. Predictors were scaled between zero and 1, and  
757 we used 3-fold cross validation, leaving out 1/3<sup>rd</sup> of the patients at each iteration to identify a global  
758 regularization strength,  $\lambda$ , solving for

$$759 \quad \operatorname{argmin}_{\beta} \left\{ \frac{1}{2\eta} \sum_{i=1}^{\eta} (y_i - \sum_{j=1}^{\rho} x_{ij}\beta_j)^2 + \frac{1}{2}\lambda \sum_{j=1}^{\rho} |\beta_j| + \frac{1}{2}\lambda \sum_{j=1}^{\rho} \beta_j^2 \right\}$$

760  
761 where  $\eta$  is the total number of observed daily log changes in genera and white blood cells, and  $\rho$  the  
762 total number of predictors. This yielded a strongly regularizing  $\lambda_s$ , and thus few predictors. To  
763 characterize potential bidirectional relationships between white blood cell counts and the gut  
764 microbiota, we iteratively reduced the regularization strength until the strongest interaction between  
765 microbiota and white blood cell dynamics, i.e. *Faecalibacterium* with neutrophil dynamics, was  
766 detected. We then re-ran the regression with this reduced regularization strength,  $\lambda_r$ .

767

#### 768 *Shotgun sequencing*

769 Sequencing of 124 post-neutrophil engraftment was conducted on the Illumina HiSeq platform. For  
770 details and the processing of the FASTQ files, see supplementary methods. We used the HUMAnN2  
771 pipeline<sup>70</sup> with default settings for functional profiling of our samples, with the UniRef90 data base  
772 and ChocoPhlAn for alignment, and we renormalized our samples by library depth to copies per  
773 million. We used MetaCyc to obtain stratified and unstratified pathway abundances.

774

#### 775 *Statistical analysis of shotgun data*

776 We calculated the predicted microbiota potency score for each sample and separately for neutrophils,  
777 lymphocytes and monocytes, by multiplying the abundances of taxa in each of the 124 samples with  
778 the corresponding posterior coefficients obtained from the PBSC inference. To distinguish the sets of  
779 metabolic functions that separate samples with positive and negative predicted potencies, we  
780 converted the pathway abundances into presence and absence profiles. We performed a linear  
781 discriminant analysis between positive and negative potency samples with a least squares solver and  
782 automatic shrinkage using the Ledoit-Wolf lemma using the sklearn package for the Python  
783 programming language<sup>67</sup>. To assess differences in the presence or absence of pathways between  
784 samples with positive and negative potency, we used Fisher's exact test for each pathway.

785 **Supplementary Figures**

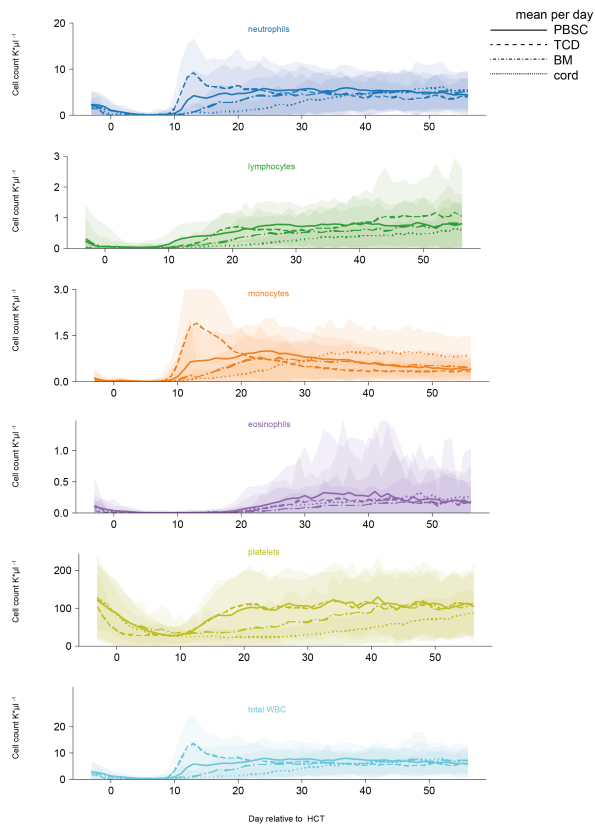

786  
787  
788  
789  
790

**Figure S1:** White blood cell counts and platelet counts per graft source over the first 100 days post HCT per day relative to HCT; lines: mean, shaded:  $\pm$  standard deviations).

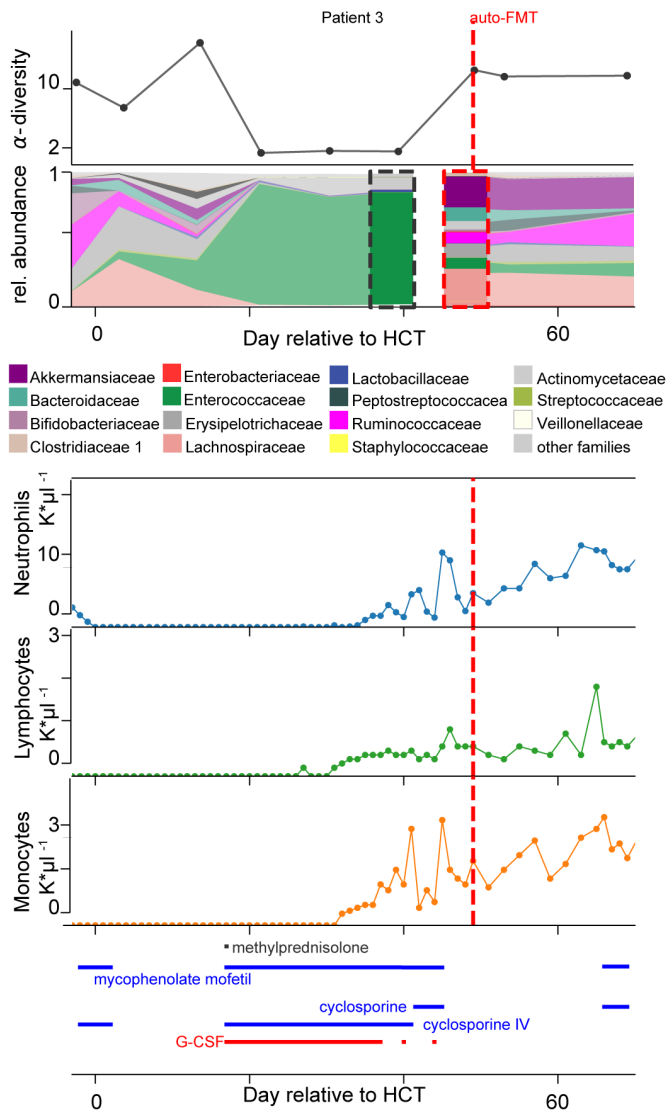

791  
792  
793  
794  
795  
796

**Figure S2:** HCT patient who received an autologous fecal microbiota transplant (auto-FMT, dashed red line) that restored commensal microbial families and ecological diversity in the gut microbiota, with concurrent cell counts of peripheral neutrophils, lymphocytes and monocytes and immunomodulatory drug administrations.

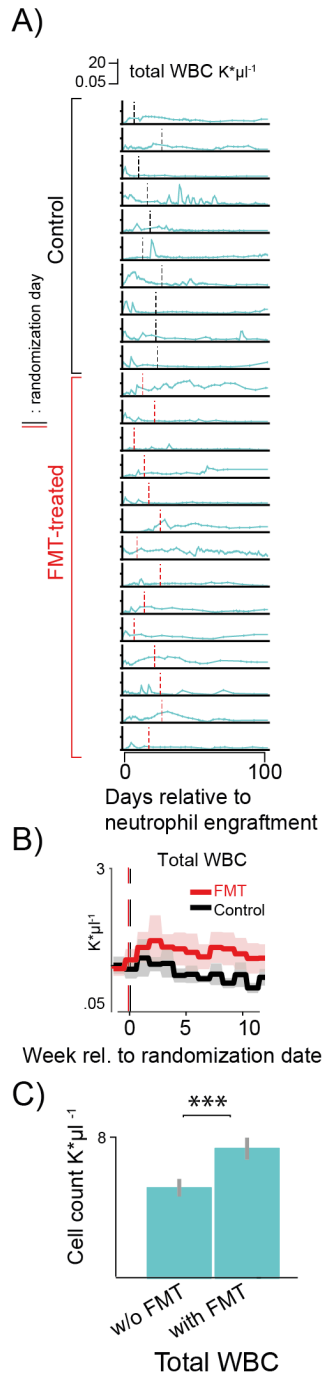

797  
798  
799  
800  
801  
802  
803  
804  
805  
806  
807  
808  
809

**Figure S3: Total counts of white blood cells increased in FMT-treated patients in the weeks following the treatment compared to control patients.** A) Total white blood cell counts in 24 patients enrolled in a randomized controlled trial to receive an autologous fecal microbiota transplant post-neutrophil engraftment (10 control: black vertical line, 14 FMT treated: red vertical line,). B) Weekly mean cell counts aligned to the date of randomization into FMT treatment arm (red) or control (black). Line: weekly mean, shaded region: 95%-CI C) Results from a linear mixed effects model with random effects per patient and per day relative to neutrophil engraftment confirms that the total white blood cell counts is higher in patients receiving auto-FMT after their treatment as compared to control patients after the randomization date, bars and confidence intervals for the averages of observed white blood cell counts without FMT and post-FMT (\*\*\*:  $p < 0.001$ ).

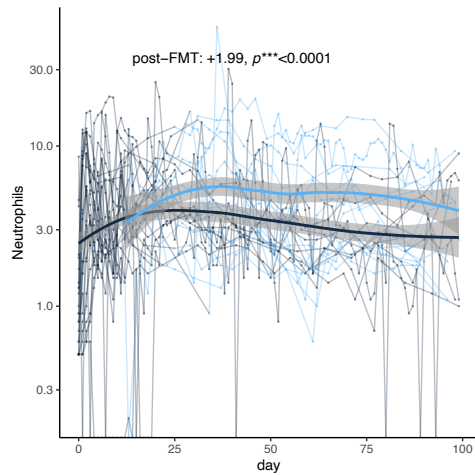

810  
811  
812  
813  
814

**Figure S4:** Neutrophil counts in 24. FMT trial patients. Thin lines: raw data (blue: post-FMT); thick black: mean per day, thick blue: mean+post-FMT coefficient. Means and confidence intervals (shaded region) from linear mixed effects model (methods).

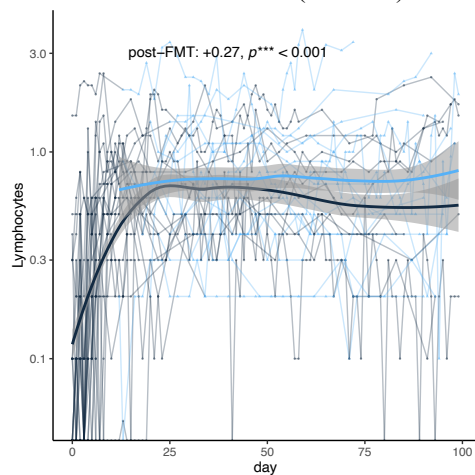

815  
816  
817  
818  
819  
820

**Figure S5:** Lymphocyte counts in 24. FMT trial patients. Thin lines: raw data (blue: post-FMT); thick black: mean per day, thick blue: mean+post-FMT coefficient. Means and confidence intervals (shaded region) from linear mixed effects model (methods).

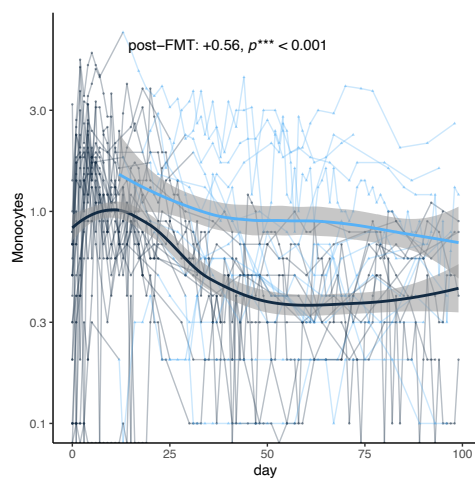

821  
822  
823  
824  
825

**Figure S6:** Monocyte counts in 24. FMT trial patients. Thin lines: raw data (blue: post-FMT); thick black: mean per day, thick blue: mean+post-FMT coefficient. Means and confidence intervals (shaded region) from linear mixed effects model (methods).

826  
827

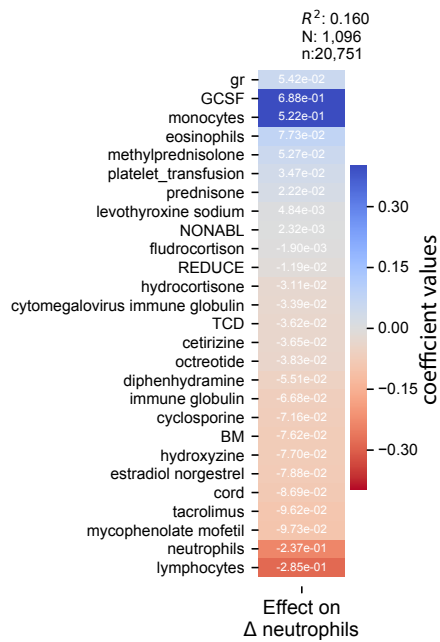

828  
829  
830  
831  
832  
833  
834  
835

**Figure S7:** “Stage 1” regression on neutrophil dynamics on patients without microbiome data. Coefficients from 10-fold cross-validated elastic net regression daily changes in neutrophils. gr: intercept; TCD: T-cell depleted graft (ex-vivo) by CD34+selection; PBSC: peripheral blood stem cells; BM: bone marrow; cord: umbilical cord blood; NONABL: Nonmyeloablative; REDUCE: reduced-intensity conditioning regimen; F: female; N: patients, n: samples (daily changes in neutrophils).

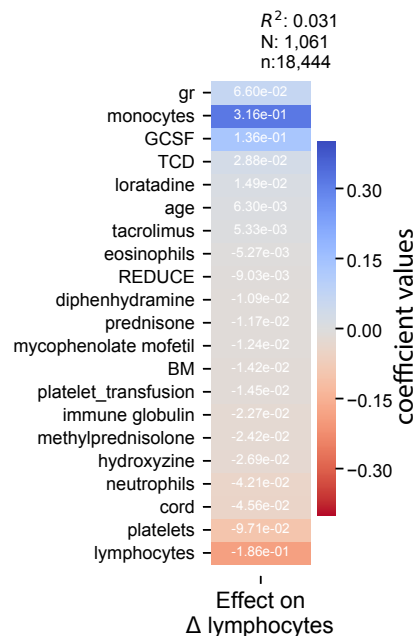

836  
837  
838  
839  
840  
841  
842

**Figure S8:** “Stage 1” regression on lymphocytes dynamics on patients without microbiome data. Coefficients from 10-fold cross-validated elastic net regression daily changes in lymphocytes. gr: intercept; TCD: T-cell depleted graft (ex-vivo) by CD34+selection; PBSC: peripheral blood stem cells; BM: bone marrow; cord: umbilical cord blood REDUCE: reduced-intensity conditioning regimen; F: female. N: patients, n: samples (daily changes in lymphocytes).

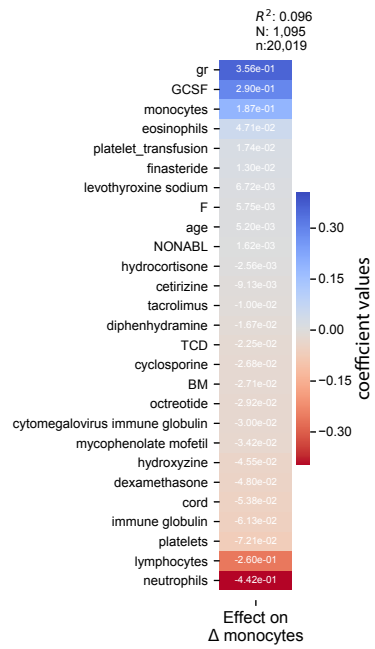

843  
844  
845  
846  
847  
848

**Figure S9:** “Stage 1” regression on lymphocytes dynamics on patients without microbiome data. Coefficients from 10-fold cross-validated elastic net regression daily changes in lymphocytes. gr: intercept; TCD: T-cell depleted graft (ex-vivo) by CD34+selection; PBSC: peripheral blood stem cells; BM: bone marrow; cord: umbilical cord blood REDUCE: reduced-intensity conditioning regimen; F: female. N: patients, n: samples (daily changes in lymphocytes).

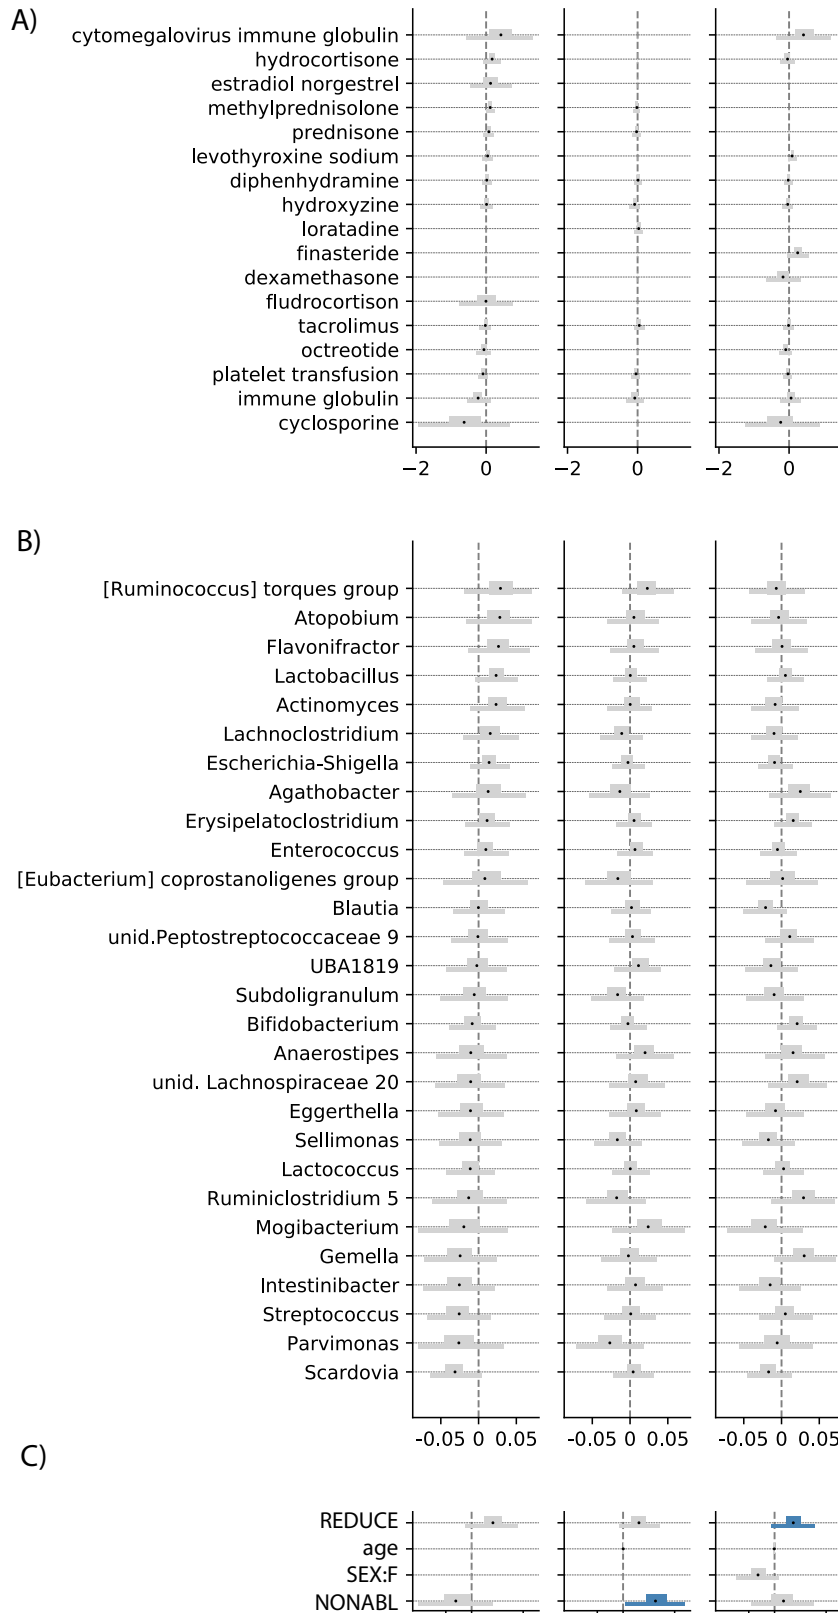

849  
850  
851  
852  
853

**Figure S10:** Additional coefficient estimates of medications (A), additional genera (B) and metadata (C) from the Bayesian regression, see also Figure 3. REDUCE: reduced-intensity conditioning regimen; NONABL: non-meloablative conditioning regimen. F: female



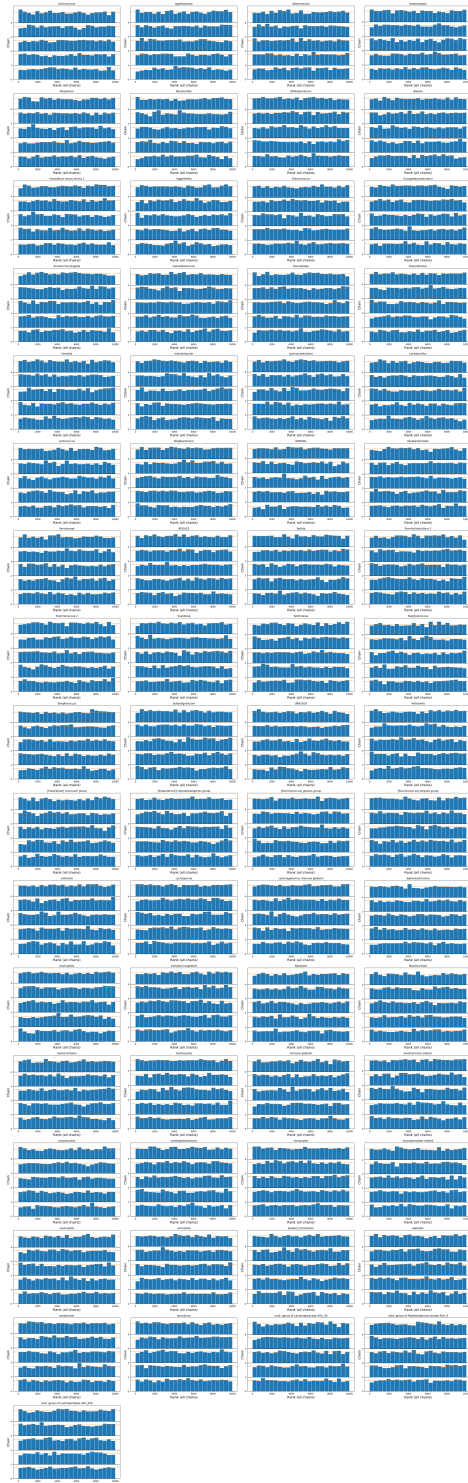

**Figure S11:** Posterior sampling converged. Histograms of the ranked posterior draws from the model of neutrophil dynamics in PBSC patients (ranked over all chains), plotted separately for each chain (see supplementary methods), show no substantial differences between chains<sup>71</sup>.



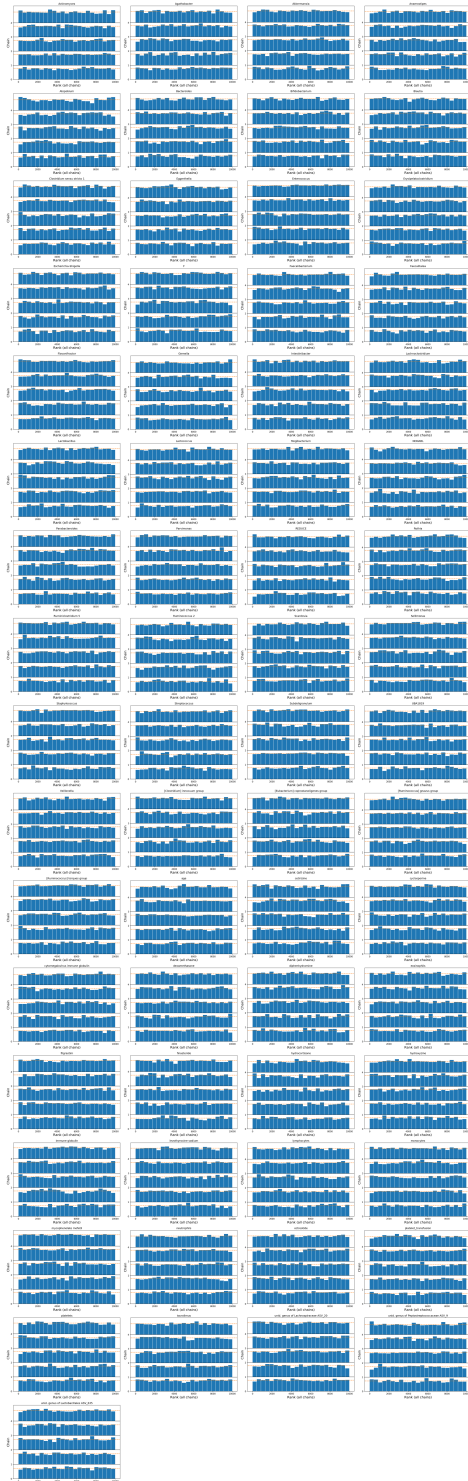

**Figure S13:** Posterior sampling converged. Histograms of the ranked posterior draws from the model of monocyte dynamics in PBSC patients (ranked over all chains), plotted separately for each chain (see supplementary methods), show no substantial differences between chains<sup>71</sup>.

856  
857  
858  
859  
860  
861  
862

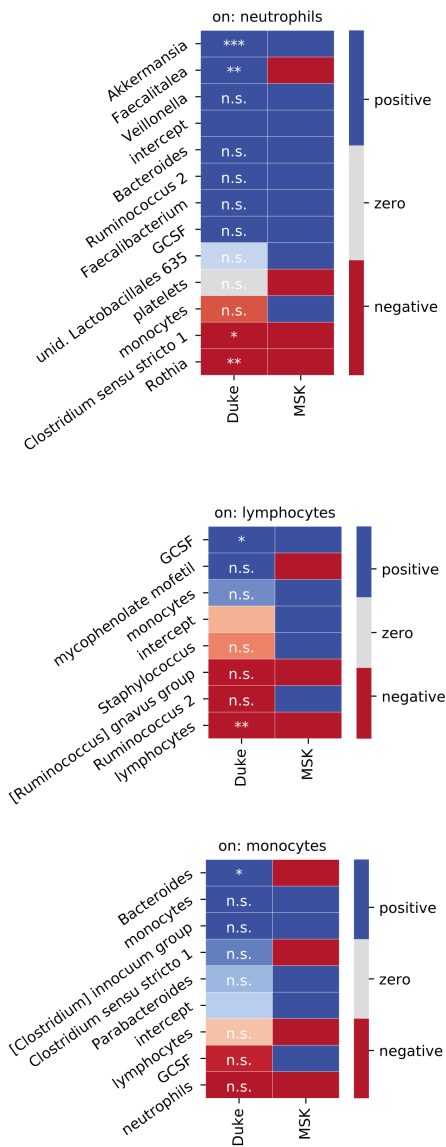

863  
864  
865  
866  
867  
868  
869  
870  
871

**Figure S14:** Validation analysis of predictors on white blood cell dynamics using data from patients treated at DukeHealth. Individual univariate regressions of microbiome and clinical predictors identified in stage 2 of our analysis on daily changes in neutrophils, lymphocytes and monocyte. Bonferroni corrected p-values: \*\*\*<0.001, \*\*<0.01, \*<0.05; p>0.05: n.s. Sign of coefficients from MSK PBSC patients for comparison.

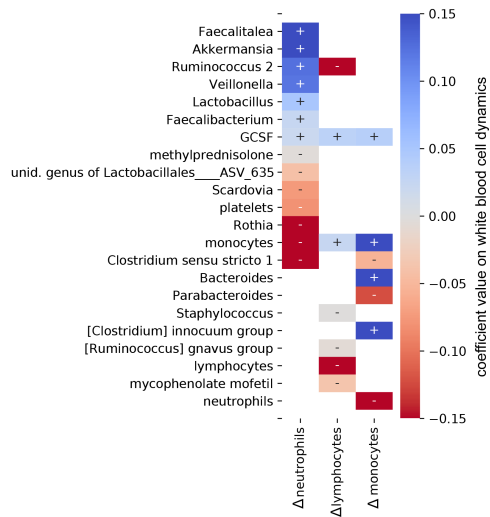

872  
873  
874  
875  
876  
877  
878  
879  
880  
881  
882

**Figure S15:** Validation analysis of predictors on white blood cell dynamics using data from patients treated at DukeHealth. Partial least squares regression of microbiome and clinical predictors identified in stage 2 of our analysis on daily changes in neutrophils, lymphocytes and monocyte.

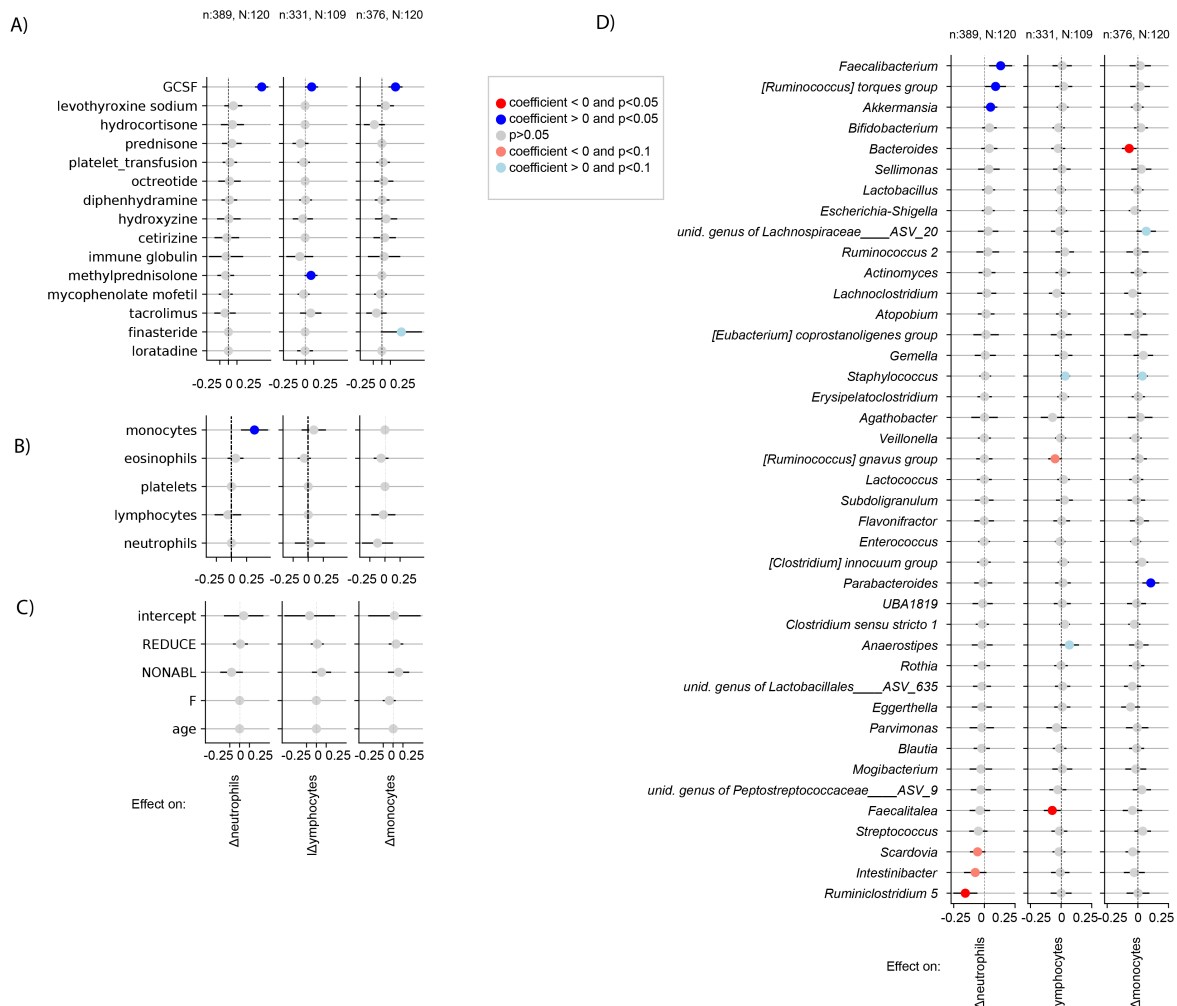

883

884 **Figure S16:** Validation analysis of the main model using absolute bacterial abundances as predictors instead of  
 885 relative abundances in Figure 3. Results show coefficients from a least squares regression for medications (A),  
 886 white blood cell feedbacks (B) metadata (C) and total genus abundances (D) of neutrophil, lymphocyte and  
 887 monocyte daily log-changes. This was only possible for only a subset of the data for which we obtained absolute  
 888 bacterial abundance estimates (methods), n: samples, N: patients.  
 889

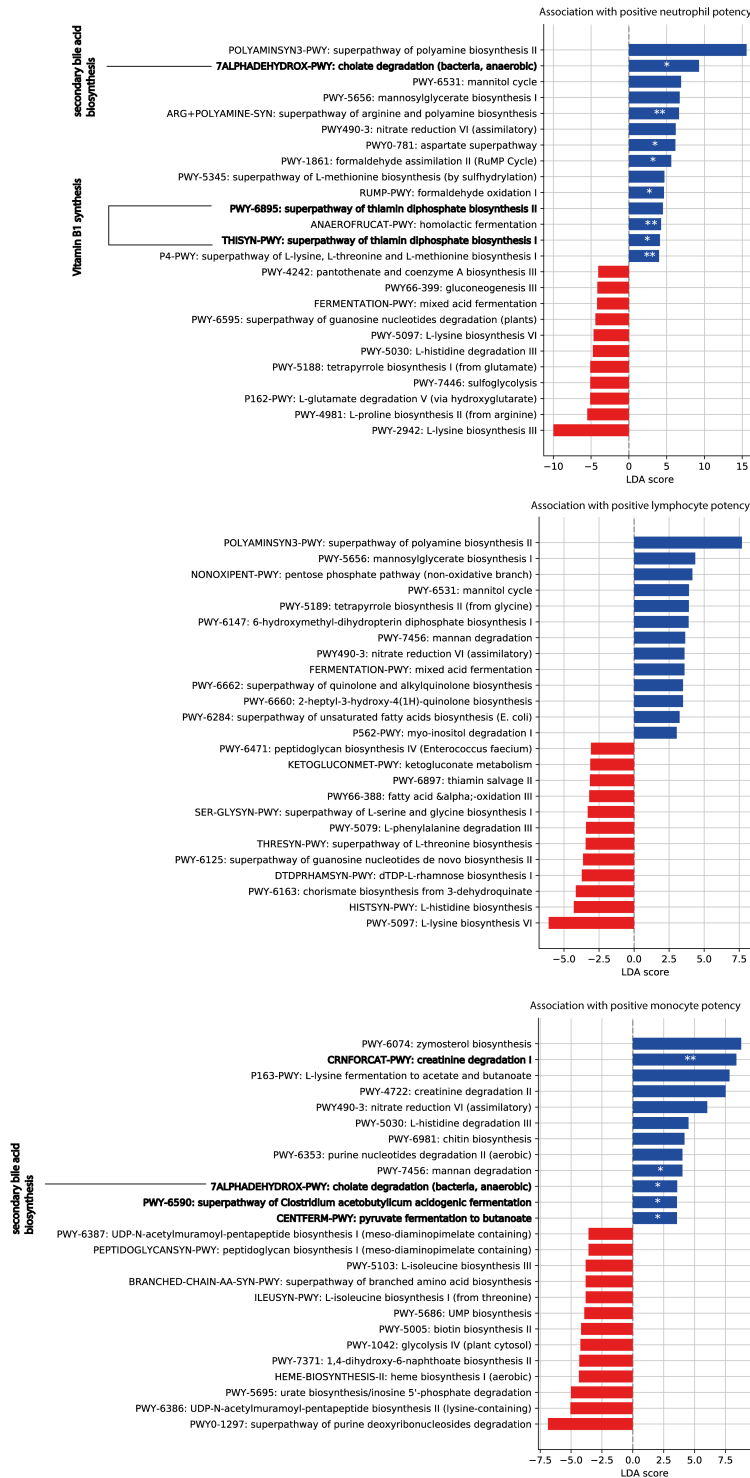

890  
 891  
 892  
 893  
 894  
 895

**Figure S17:** Functional analysis of microbiota samples. To distinguish samples predicted to increase rates of white blood cells, a microbiota potency score was calculated from posterior coefficients (Figure 3, methods) and the relative abundance of taxa in samples. Bars show linear discriminant analysis (LDA) scores of MetaCyc

896 pathway profiles from 124 shotgun sequenced samples that distinguished positive and negative potency samples  
 897 the most (LDA-score magnitude in the 95<sup>th</sup> percentile). Highlighted pathways are discussed in the main text. For  
 898 each pathway, we tested differences between positive and negative potency samples using Fisher's exact test; p-  
 899 value <0.001: \*\*\*, <0.01: \*\*, <0.05: \*.

900  
 901  
 902  
 903  
 904

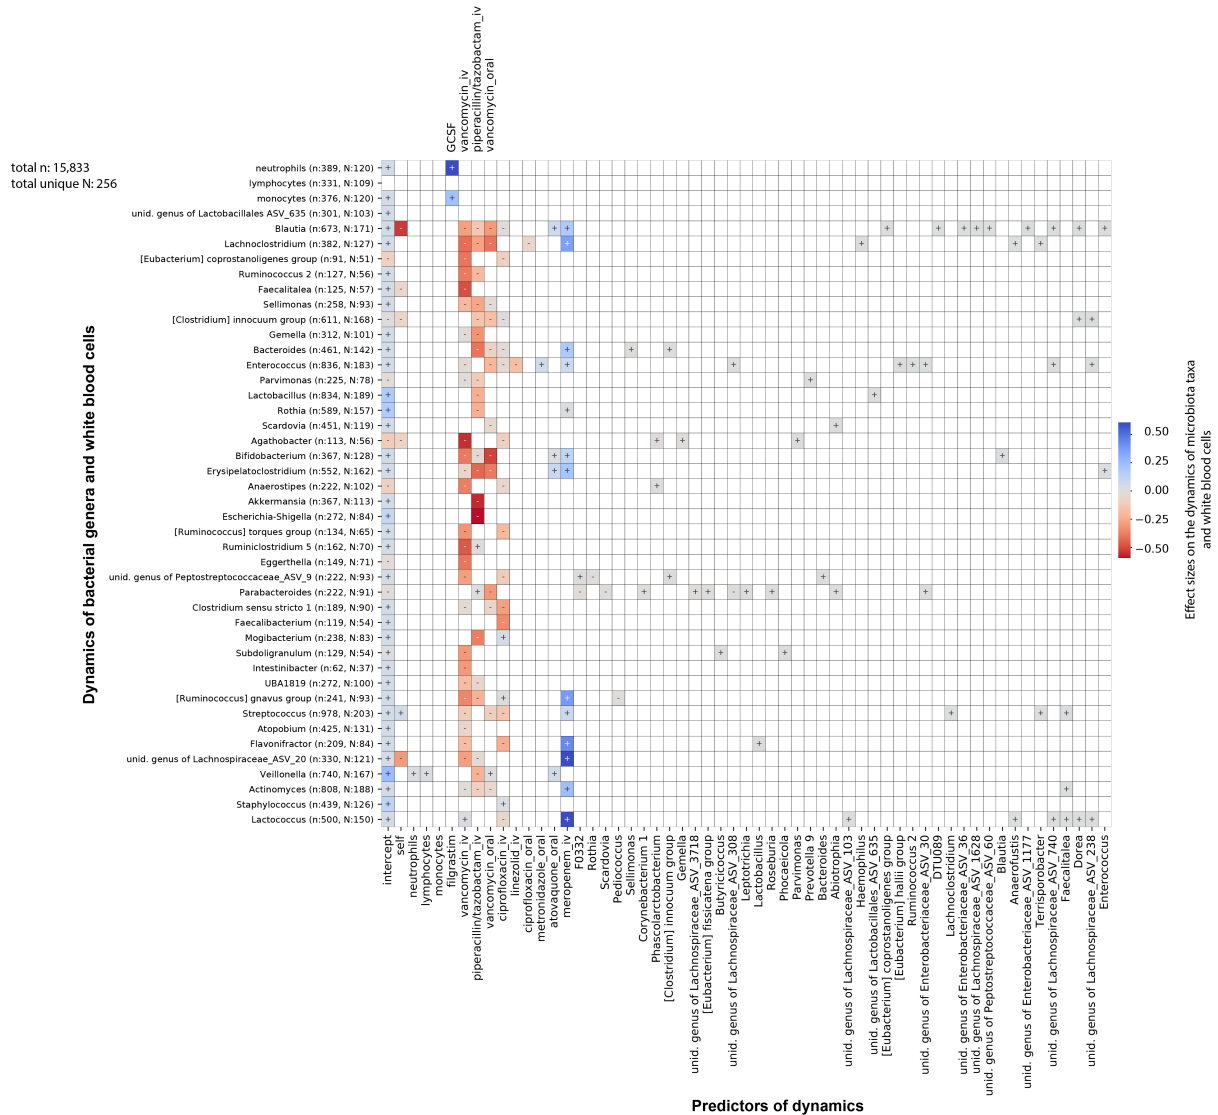

905  
 906  
 907  
 908  
 909  
 910  
 911

**Figure S18:** Jointly inferred association network between white blood cell and bacterial genus dynamics (methods). Strong regularization yields few non-zero coefficients and antibiotics dominate the dynamics.



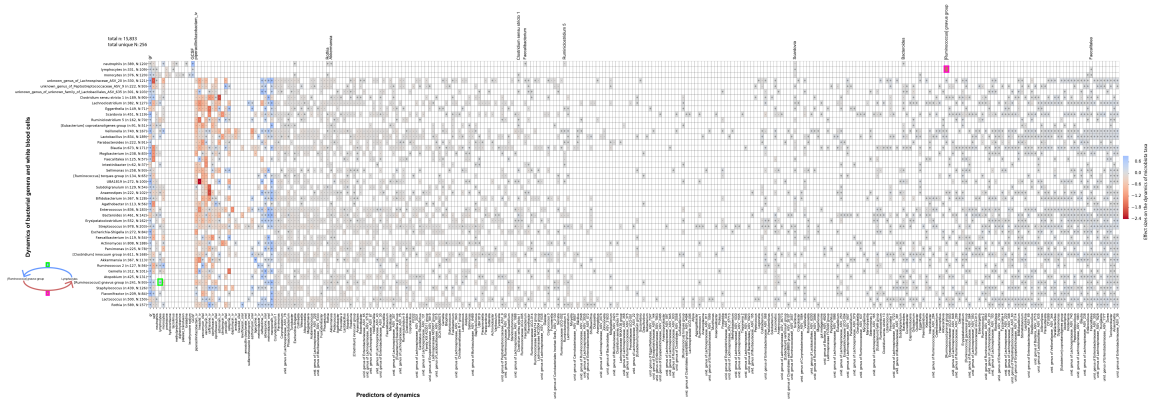

912  
913  
914  
915  
916  
917  
918  
919  
920

**Figure S19:** Jointly inferred association network between white blood cell and bacterial genus dynamics with reduced regularization (methods) indicates potential bidirectional feedbacks, e.g. between lymphocytes and *[Ruminococcus] gnnavus* group (highlighter green boxes, and cartoon).

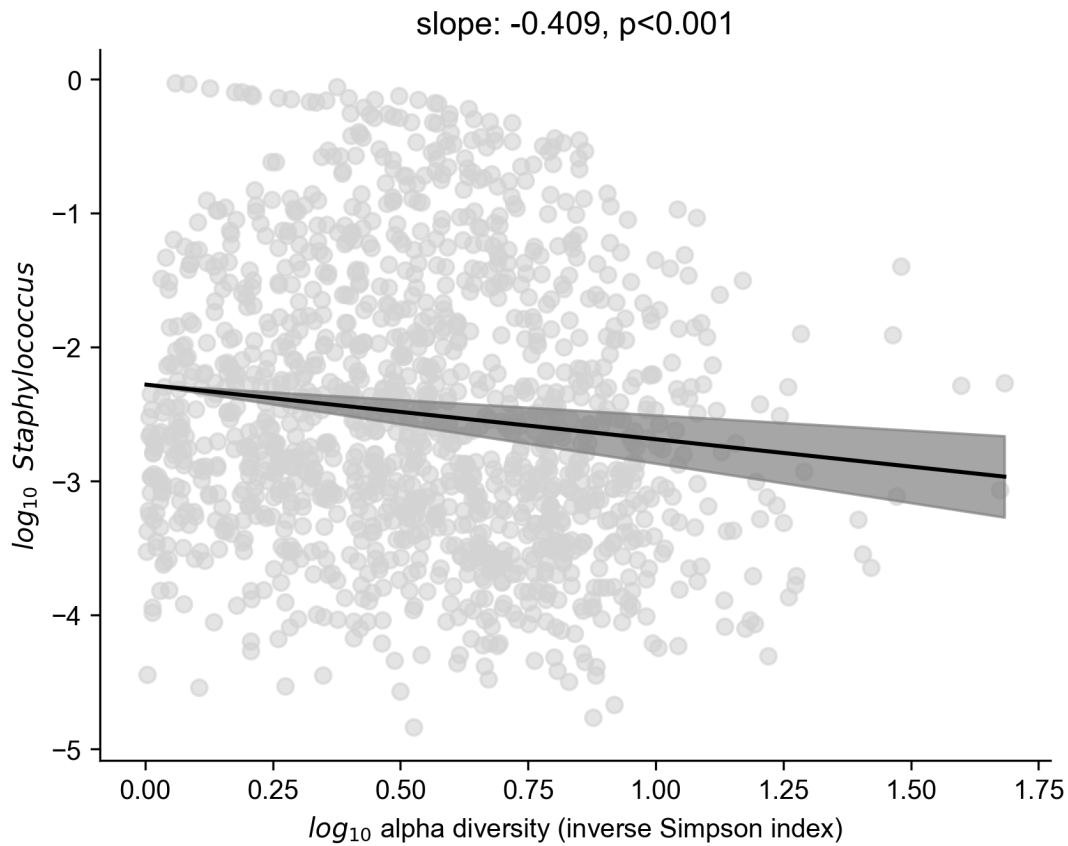

921  
922  
923  
924  
925  
926

**Figure S20:** The relative non-zero abundance of *Staphylococcus* is inversely related to microbiome alpha diversity, shaded: 95% confidence intervals.



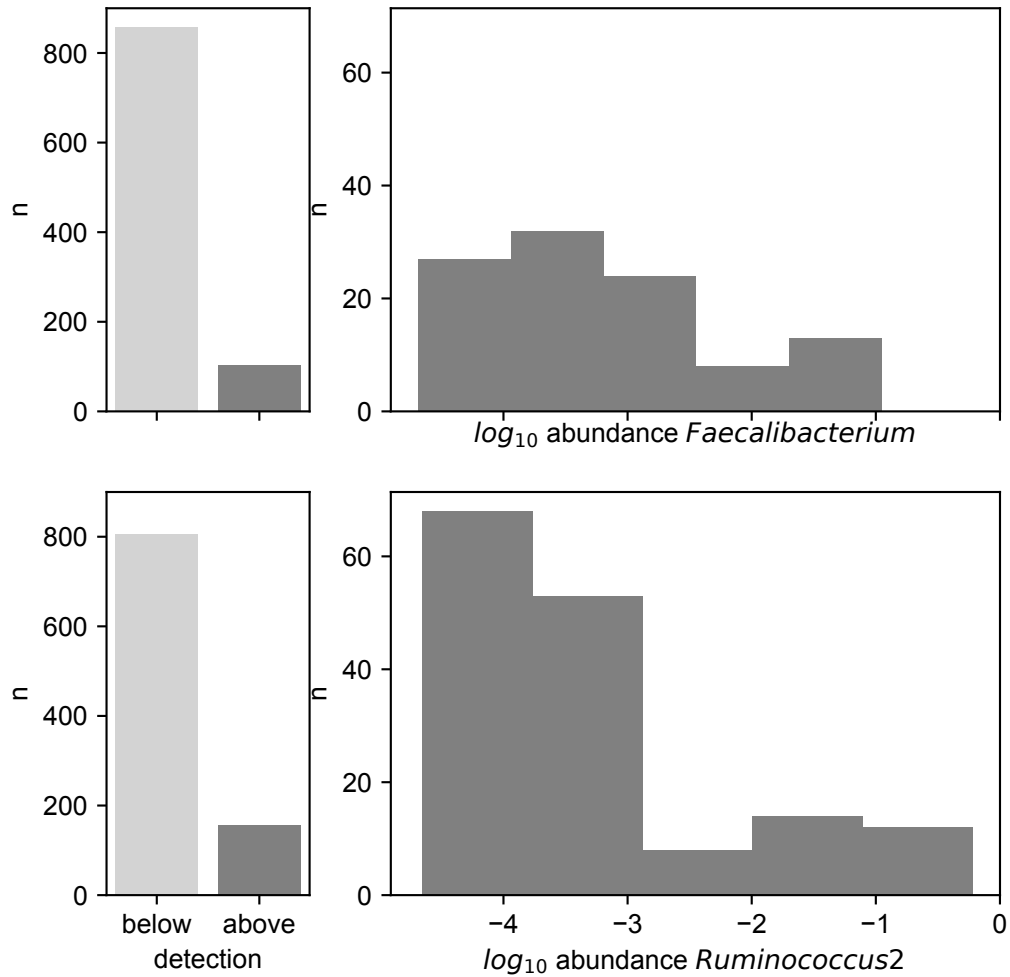

927  
928  
929  
930  
931  
932  
933

**Figure S21:** Abundance profiles of the two genera, *Faecalibacterium* and *Ruminococcus 2*, most strongly associated with white blood cell increase; number of times detected (left) and  $\log_{10}$  abundance distribution when above detection (right).

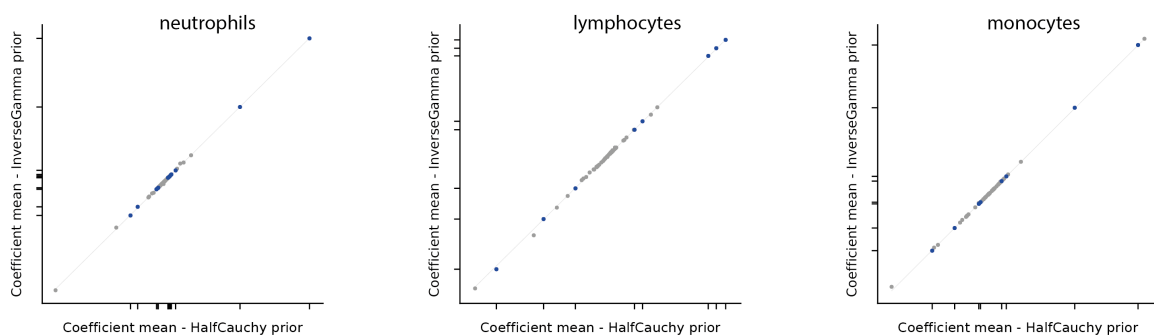

934  
935  
936  
937  
938  
939  
940  
941

**Figure S22:** Posterior association coefficients do not depend on the choice of prior for  $\sigma$  in the main Bayesian model. Plotted are the posterior means from our main analysis against the equivalent inference with an inverse Gamma prior ( $\alpha=1$ ,  $\beta=1$ ).

942 Table S1: Data set summary and patient characteristics. HCT-graft types: TCD: T-cell depleted graft (*ex-vivo*)  
 943 by CD34+selection; PBSC: peripheral blood stem cells; BM: bone marrow; cord: umbilical cord blood;  
 944 Conditioning intensity: Bacigalupo classification, graded categories from most to least intense (ABLATIVE,  
 945 REDUCE, NONABL).  
 946

|                               |                                     |         |
|-------------------------------|-------------------------------------|---------|
| <b>patients</b>               |                                     | 2,926   |
| <b>HCT therapies*</b>         |                                     | 3,060   |
| <b>blood samples</b>          | total                               | 450,635 |
|                               | between HCT-day -21 and HCT-day 183 | 193,396 |
| <b>Disease</b>                | Leukemia                            | 1,635   |
|                               | Non-Hodgkin's Lymphoma              | 415     |
|                               | Multiple Myeloma                    | 170     |
|                               | Hodgkin's disease                   | 88      |
|                               | other                               | 752     |
| <b>HCT graft type</b>         | TCD                                 | 1,106   |
|                               | PBSC unmodified                     | 959     |
|                               | BM unmodified                       | 617     |
|                               | cord                                | 378     |
| <b>Conditioning intensity</b> | ABLATIVE                            | 65%     |
|                               | REDUCE                              | 21%     |
|                               | NONABL                              | 13%     |
| <b>Gender</b>                 | M                                   | 58%     |
|                               | F                                   | 42%     |
| <b>Age of adults (years)</b>  | 25%-tile                            | 39      |
|                               | mean                                | 50      |
|                               | 75%-tile                            | 62      |
| <b>Microbiome samples</b>     | total                               | 12,633  |
|                               | - from patients with blood data     | 10,680  |
|                               | - of those, post engraftment        | 4,179   |
|                               | - of those with daily change in WBC | 2,615   |
|                               | patients with microbiome sample     | 1,290   |

947 \*) some patient received several HCTs

948

949

950

Table S2: Patient and HCT characteristics of 24 patients enrolled in the randomized controlled FMT trial.

|                        | <b>control</b> | <b>FMT treated</b> |
|------------------------|----------------|--------------------|
| <b>N patients</b>      | 10             | 14                 |
| <b>ABLATIVE</b>        | 6              | 7                  |
| <b>REDUCE</b>          | 4              | 7                  |
| <b>BM unmodified</b>   | 1              | 3                  |
| <b>PBSC unmodified</b> | 3              | 4                  |
| <b>TCD</b>             | 5              | 3                  |
| <b>cord</b>            | 1              | 4                  |

951

952

953

954

955

956

957

958

959 Table S3: Patient and HCT characteristics of the subset of patients who donated microbiota samples.

|                               |                        |       |
|-------------------------------|------------------------|-------|
| <b>patients</b>               |                        | 1,294 |
| <b>Disease distribution</b>   | Leukemia               | 51%   |
|                               | Non-Hodgkin's Lymphoma | 15%   |
|                               | Multiple Myeloma       | 8%    |
|                               | Hodgkin's disease      | 3%    |
|                               | other                  | 23%   |
| <b>HCT graft type</b>         | TCD                    | 37%   |
|                               | PBSC unmodified        | 38%   |
|                               | BM unmodified          | 9%    |
|                               | cord                   | 16%   |
| <b>Conditioning intensity</b> | ABLATIVE               | 55%   |
|                               | REDUCE                 | 34%   |
|                               | NONABL                 | 11%   |
| <b>Gender</b>                 | M                      | 59%   |
|                               | F                      | 41%   |
| <b>Age (years)</b>            | 25%-tile               | 46    |
|                               | mean                   | 54    |
|                               | 75%-tile               | 65    |

960  
961  
962 Table S4: Patient and HCT characteristics of the subset of patients who did not donate microbiota samples.

|                               |                        |       |
|-------------------------------|------------------------|-------|
| <b>patients</b>               |                        | 1,010 |
| <b>Disease distribution</b>   | Leukemia               | 53%   |
|                               | Non-Hodgkin's Lymphoma | 17%   |
|                               | Multiple Myeloma       | 5%    |
|                               | Hodgkin's disease      | 5%    |
|                               | other                  | 20%   |
| <b>HCT graft type</b>         | TCD                    | 40%   |
|                               | PBSC unmodified        | 31%   |
|                               | BM unmodified          | 17%   |
|                               | cord                   | 12%   |
| <b>Conditioning intensity</b> | ABLATIVE               | 65%   |
|                               | REDUCE                 | 14%   |
|                               | NONABL                 | 21%   |
| <b>Gender</b>                 | M                      | 58%   |
|                               | F                      | 42%   |
| <b>Age (years)</b>            | 25%-tile               | 36    |
|                               | mean                   | 47    |
|                               | 75%-tile               | 59    |

963  
964  
965  
966 Table S5: Patient and HCT characteristics of the Duke University patient cohort.

|                             |                        |     |
|-----------------------------|------------------------|-----|
| <b>patients</b>             |                        | 493 |
| <b>Disease distribution</b> | Lymphoma               | 11% |
|                             | Leukemia               | 50% |
|                             | Non-Hodgkin's Lymphoma | 4%  |
|                             | Multiple Myeloma       | 8%  |

|                               |                   |     |
|-------------------------------|-------------------|-----|
| <b>HCT graft type</b>         | Hodgkin's disease | 4%  |
|                               | other             | 24% |
|                               | TCD               | 0%  |
|                               | PBSC unmodified   | 72% |
| <b>Conditioning intensity</b> | BM unmodified     | 11% |
|                               | cord              | 16% |
|                               | ABLATIVE          | 92% |
| <b>Gender</b>                 | NONABL            | 7%  |
|                               | M                 | 65% |
| <b>Age (years)</b>            | F                 | 35% |
|                               | 25%-tile          | 41  |
|                               | mean              | 49  |
|                               | 75%-tile          | 57  |

967  
968  
969

### Data availability

970 The data used in our study is organized in supplementary tables (data-tables.zip), with corresponding  
971 filenames (*italic*):

- 972 1. *cGENUS.csv*: relative taxon abundances in fecal microbiota samples from 12,633 stool  
973 samples
- 974 2. *cHCTMETA.csv*: HCT characteristics
- 975 3. *cINFECTIONS.csv*: positive blood culture results
- 976 4. *cMISAMPLES.csv*: NCBI SRA accession number, diversity (inverse Simpson index), total  
977 16S (where available), stool consistency for each fecal microbiota sample
- 978 5. *cMED.csv*: medication data
- 979 6. *cPIDMETA.csv*: anonymized patient demographics
- 980 7. *cWBC.csv*: absolute counts of neutrophils, lymphocytes, monocytes, eosinophils, and platelets  
981 with indication if included in analyses
- 982 8. *cDUKE\_GENUS.csv*: relative taxon abundances in fecal microbiota samples from 12,633  
983 stool samples
- 984 9. *cDUKE\_WBC.csv*: absolute counts of neutrophils, lymphocytes, monocytes, eosinophils,  
985 and platelets with indication if included in analyses
- 986 10. *cDUKE\_MED.csv*: medication data
- 987 11. *cFMT\_analysis.csv*: convenience table for Figure 2

988  
989  
990

### Code availability

991 The relevant scripts for stage 1, stage 2, and the model assessing the effect of FMT on white blood  
992 cell counts are on github:[https://github.com/jsevo/wbcdynamics\\_microbiome](https://github.com/jsevo/wbcdynamics_microbiome).
